# Supplementary material for: Metal-free approach for imidazole synthesis via one-pot N-α-C(sp3)–H bond functionalization of benzylamines
Source: Royal Society of Chemistry journal article supplement (doi:10.1039/d4ra03939d), 2024-01-01

# Supporting Information

## Metal-free Approach for Imidazole Synthesis via One-pot N- $\alpha$ -C(sp<sup>3</sup>)-H Bond Functionalization of Benzylamines

Vikas D. Kadu\*, Machhindra S. Thokal, Rajkumar K. Godase, Bhagyashree C. Kotali, Pooja S.  
Wadkar

<sup>a</sup>School of Chemical Sciences, Punyashlok Ahilyadevi Holkar Solapur University  
Solapur- 413255, Maharashtra (India)

\*Corresponding Authors: Email- [vikaskadu1@gmail.com](mailto:vikaskadu1@gmail.com)

### Contents

|                                                    |    |
|----------------------------------------------------|----|
| Spectral data of tetrasubstituted imidazoles ..... | 4  |
| 1.1 <sup>1</sup> H NMR of compound: 3a .....       | 4  |
| 1.2 <sup>13</sup> C NMR of compound: 3a .....      | 4  |
| 1.3 <sup>1</sup> H NMR of compound: 3b .....       | 5  |
| 1.4 <sup>13</sup> C NMR of compound: 3b .....      | 5  |
| 1.5 <sup>1</sup> H NMR of compound: 3c .....       | 6  |
| 1.6 <sup>13</sup> C NMR of compound: 3c .....      | 6  |
| 1.7 <sup>1</sup> H NMR of compound: 3d .....       | 7  |
| 1.8 <sup>13</sup> C NMR of compound: 3d .....      | 7  |
| 1.9 <sup>1</sup> H NMR of compound: 3e .....       | 8  |
| 1.10 <sup>13</sup> C NMR of compound: 3e .....     | 8  |
| 1.11 <sup>1</sup> H NMR of compound: 3f .....      | 9  |
| 1.12 <sup>13</sup> C NMR of compound: 3f .....     | 9  |
| 1.13 HRMS of compound: 3f .....                    | 10 |
| 1.14 <sup>1</sup> H NMR of compound: 3g .....      | 10 |

|      |                                           |    |
|------|-------------------------------------------|----|
| 1.15 | <sup>13</sup> C NMR of compound: 3g ..... | 11 |
| 1.16 | <sup>1</sup> H NMR of compound: 3h .....  | 11 |
| 1.17 | <sup>13</sup> C NMR of compound: 3h ..... | 12 |
| 1.18 | <sup>1</sup> H NMR of compound: 3i .....  | 12 |
| 1.19 | <sup>13</sup> C NMR of compound: 3i ..... | 13 |
| 1.20 | <sup>1</sup> H NMR of compound: 3j .....  | 13 |
| 1.21 | <sup>13</sup> C NMR of compound: 3j ..... | 14 |
| 1.22 | <sup>1</sup> H NMR of compound: 3k .....  | 14 |
| 1.23 | <sup>13</sup> C NMR of compound: 3k ..... | 15 |
| 1.24 | <sup>1</sup> H NMR of compound: 3l .....  | 15 |
| 1.25 | <sup>13</sup> C NMR of compound: 3l ..... | 16 |
| 1.26 | HRMS of compound: 3l .....                | 16 |
| 1.27 | <sup>1</sup> H NMR of compound: 3m .....  | 17 |
| 1.28 | <sup>13</sup> C NMR of compound: 3m ..... | 17 |
| 1.29 | <sup>1</sup> H NMR of compound: 3n .....  | 18 |
| 1.30 | <sup>13</sup> C NMR of compound: 3n ..... | 18 |
| 1.31 | HRMS of compound: 3n .....                | 19 |
| 1.32 | <sup>1</sup> H NMR of compound: 3o .....  | 19 |
| 1.33 | <sup>13</sup> C NMR of compound: 3o ..... | 20 |
| 1.34 | HRMS of compound: 3o .....                | 20 |
| 1.35 | <sup>1</sup> H NMR of compound: 3p .....  | 21 |
| 1.36 | <sup>13</sup> C NMR of compound: 3p ..... | 21 |
| 1.37 | HRMS of compound: 3p .....                | 22 |
| 1.38 | <sup>1</sup> H NMR of compound: 3q .....  | 22 |
| 1.39 | <sup>13</sup> C NMR of compound: 3q ..... | 23 |

|      |                                           |    |
|------|-------------------------------------------|----|
| 1.40 | HRMS of compound: 3q .....                | 23 |
| 1.41 | <sup>1</sup> H NMR of compound: 3r .....  | 24 |
| 1.42 | <sup>13</sup> C NMR of compound: 3r ..... | 24 |
| 1.43 | HRMS of compound: 3r .....                | 25 |

## Spectral data of tetrasubstituted imidazoles

### 1.1 $^1\text{H}$ NMR of compound: **3a**

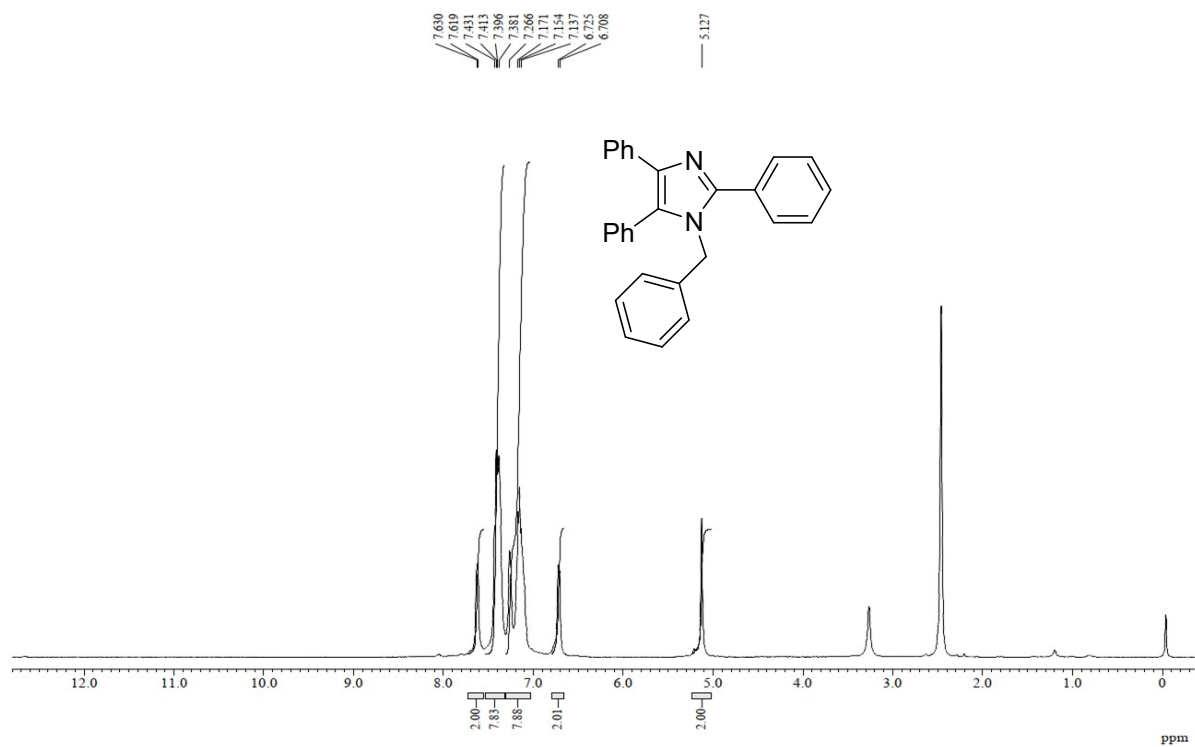

### 1.2 $^{13}\text{C}$ NMR of compound: **3a**

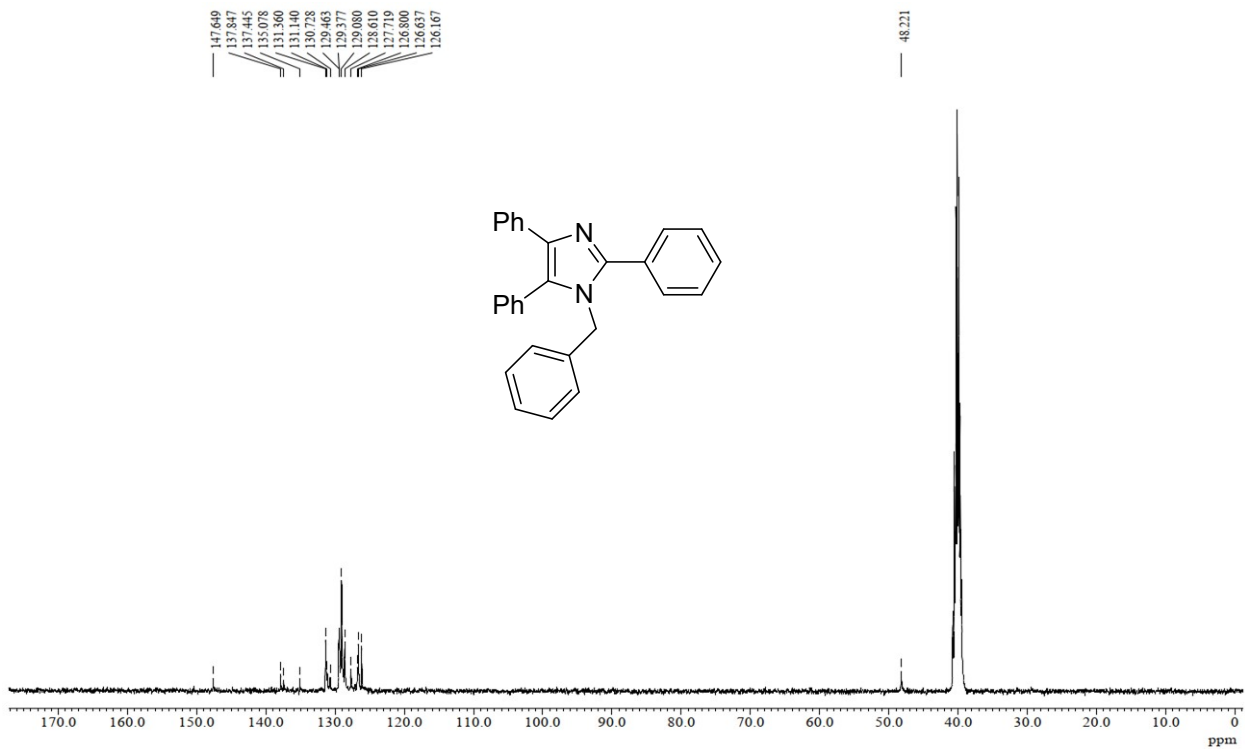

### 1.3 $^1\text{H}$ NMR of compound: **3b**

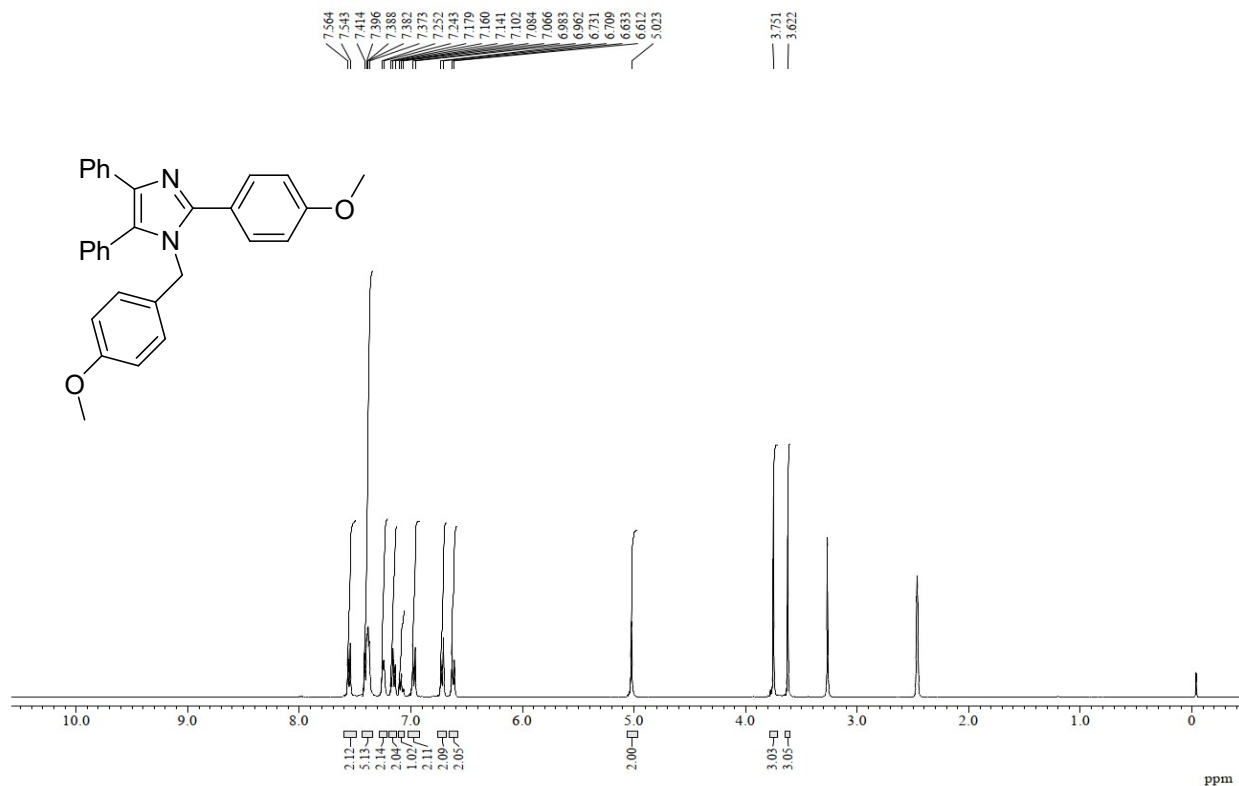

### 1.4 $^{13}\text{C}$ NMR of compound: **3b**

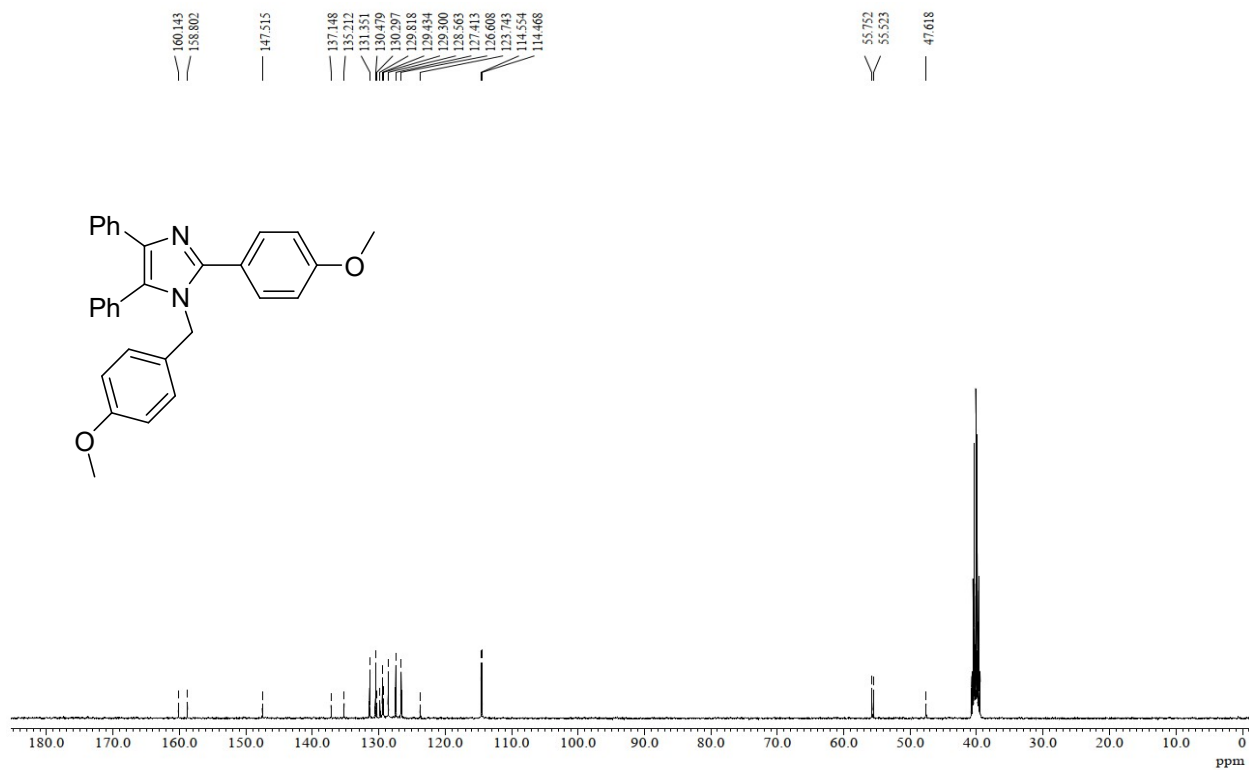

### 1.5 $^1\text{H}$ NMR of compound: **3c**

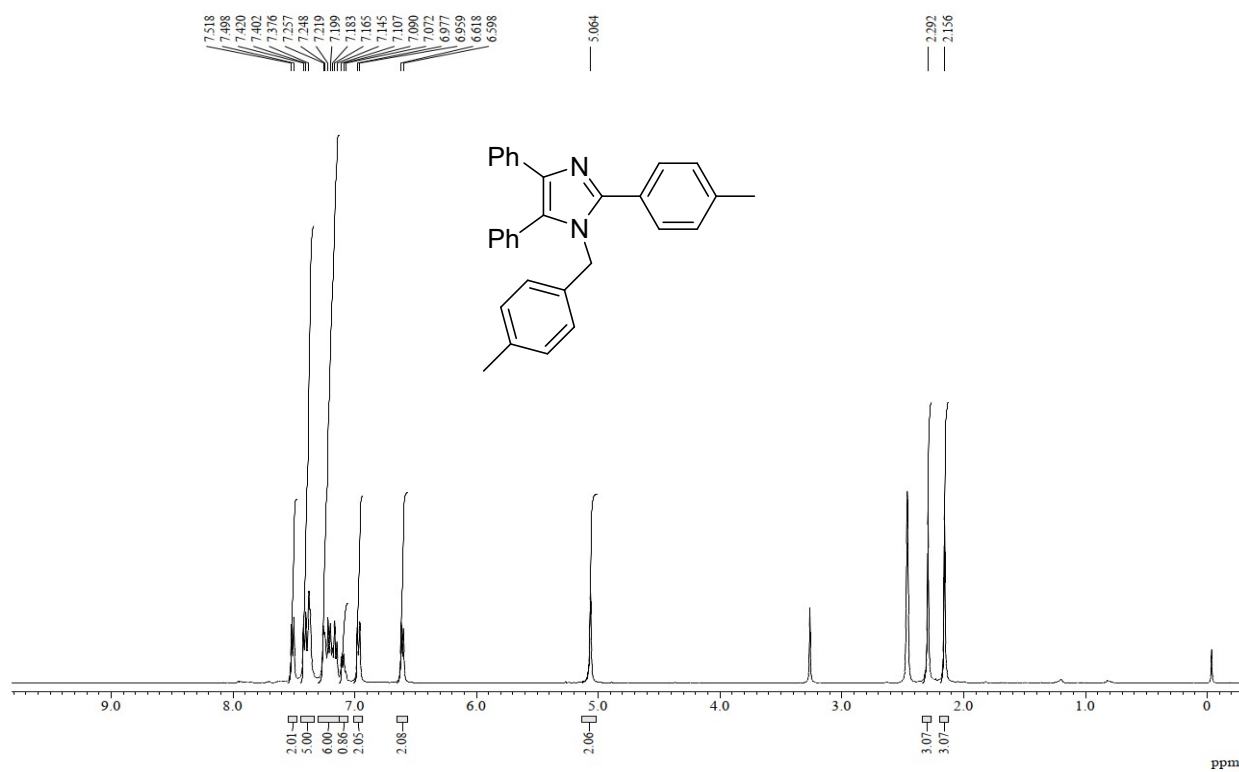

### 1.6 $^{13}\text{C}$ NMR of compound: **3c**

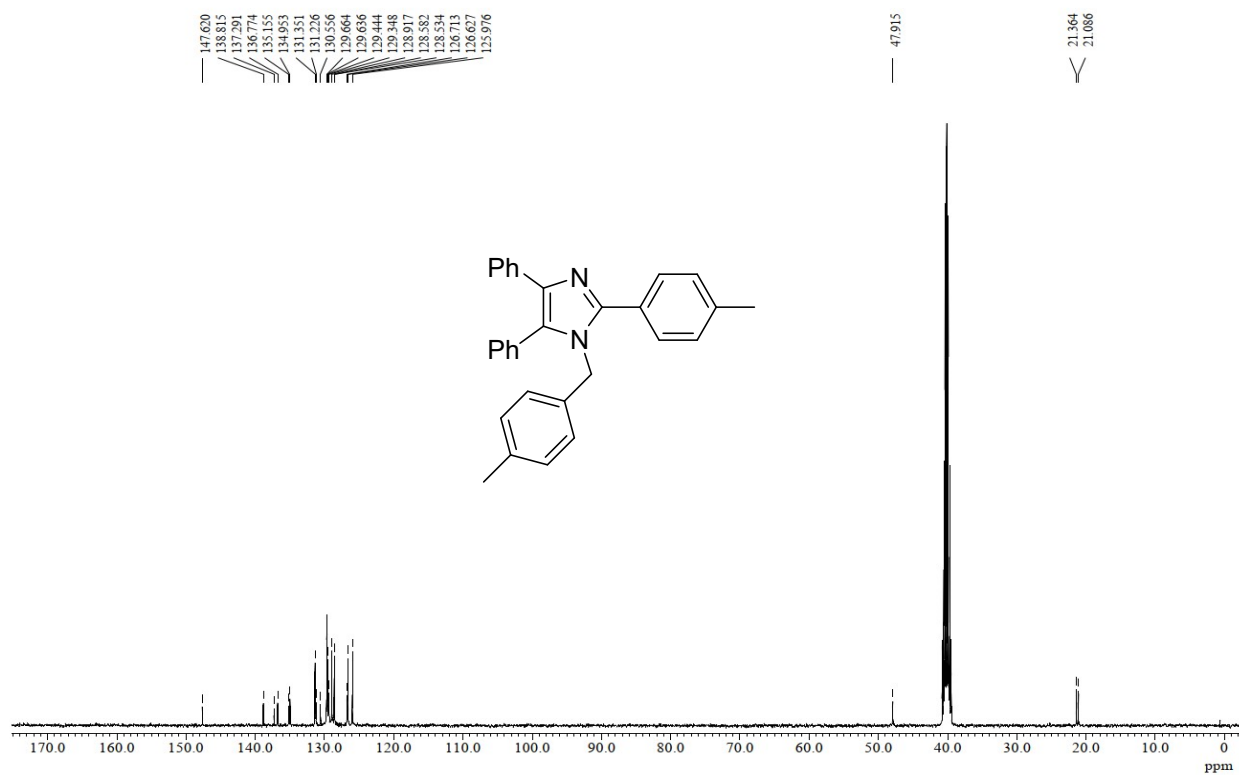

### 1.7 <sup>1</sup>H NMR of compound: 3d

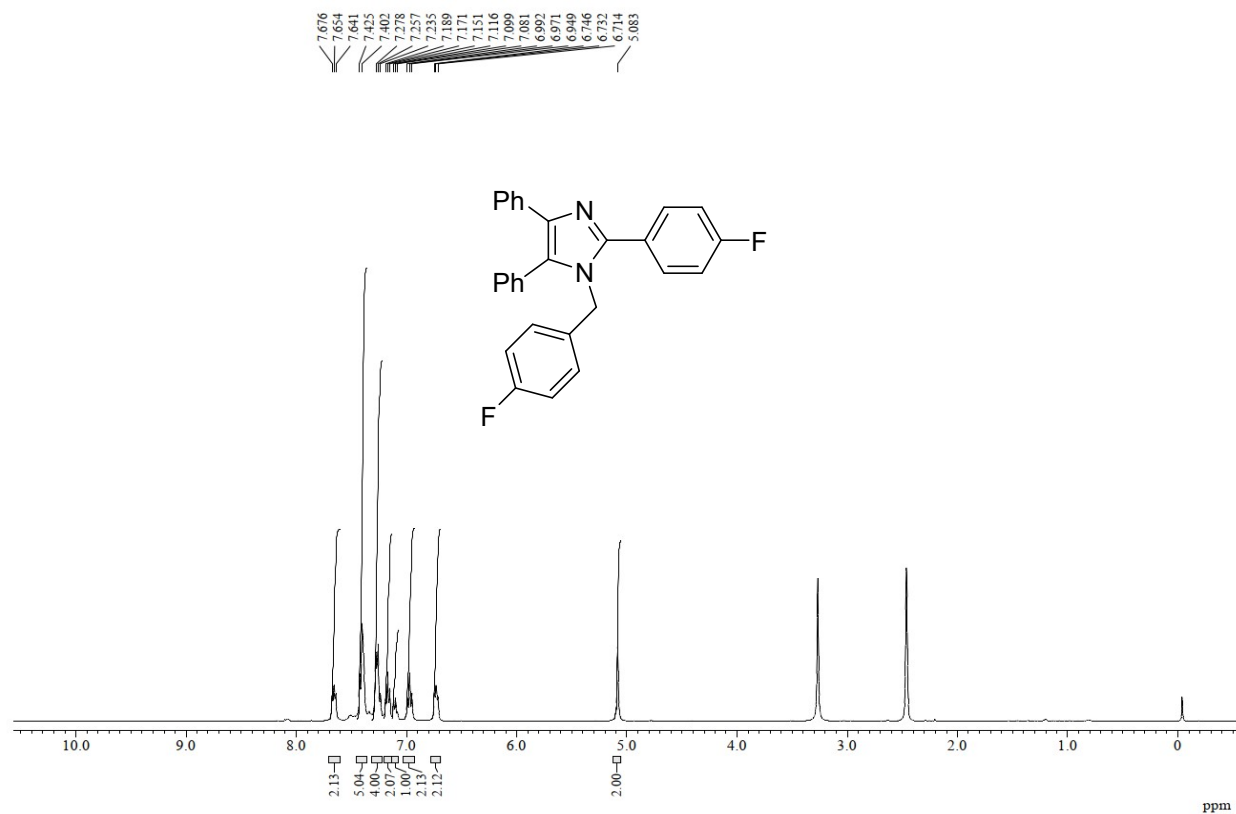

### 1.8 <sup>13</sup>C NMR of compound: 3d

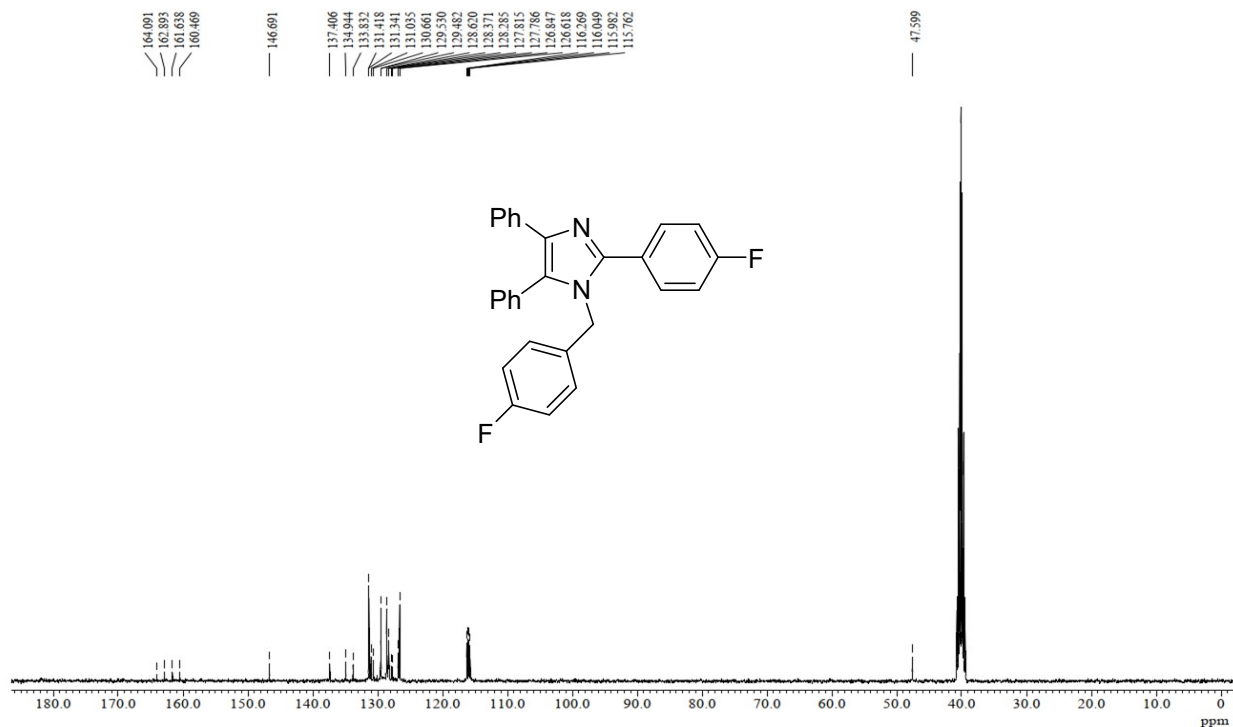

### 1.9 $^1\text{H}$ NMR of compound: **3e**

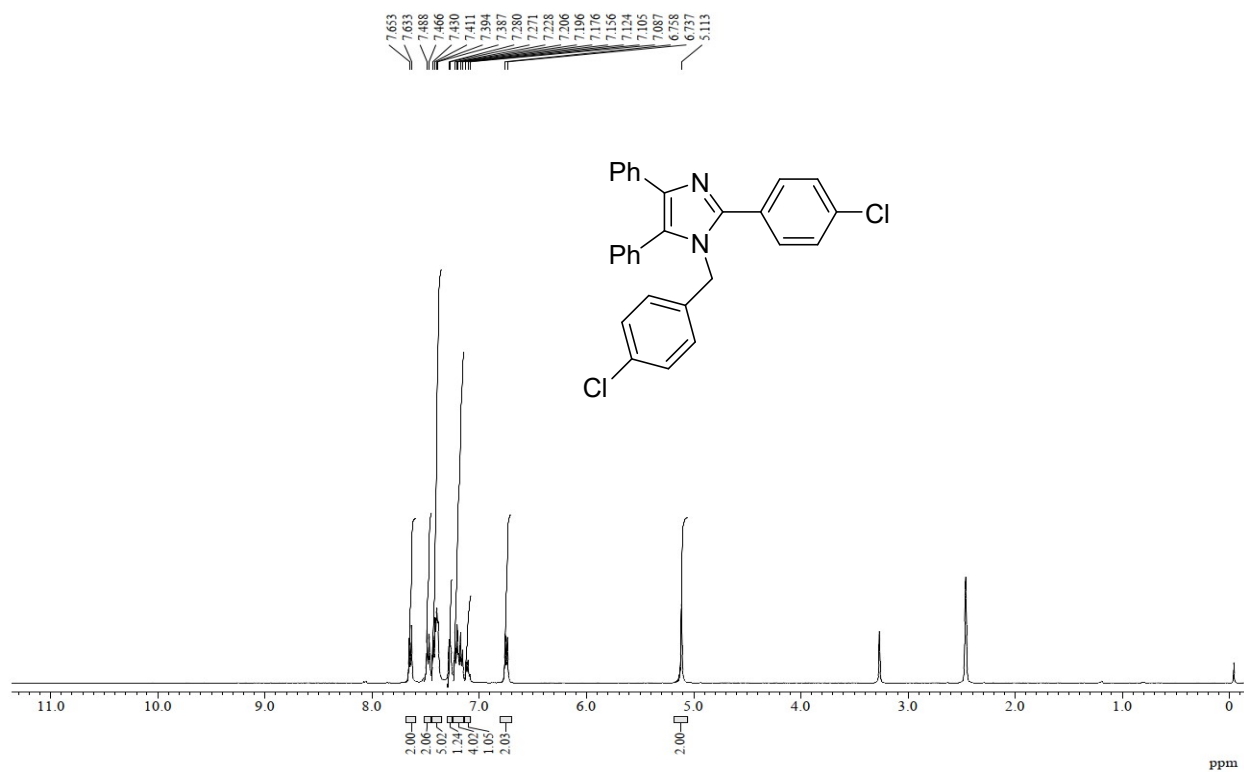

### 1.10 $^{13}\text{C}$ NMR of compound: **3e**

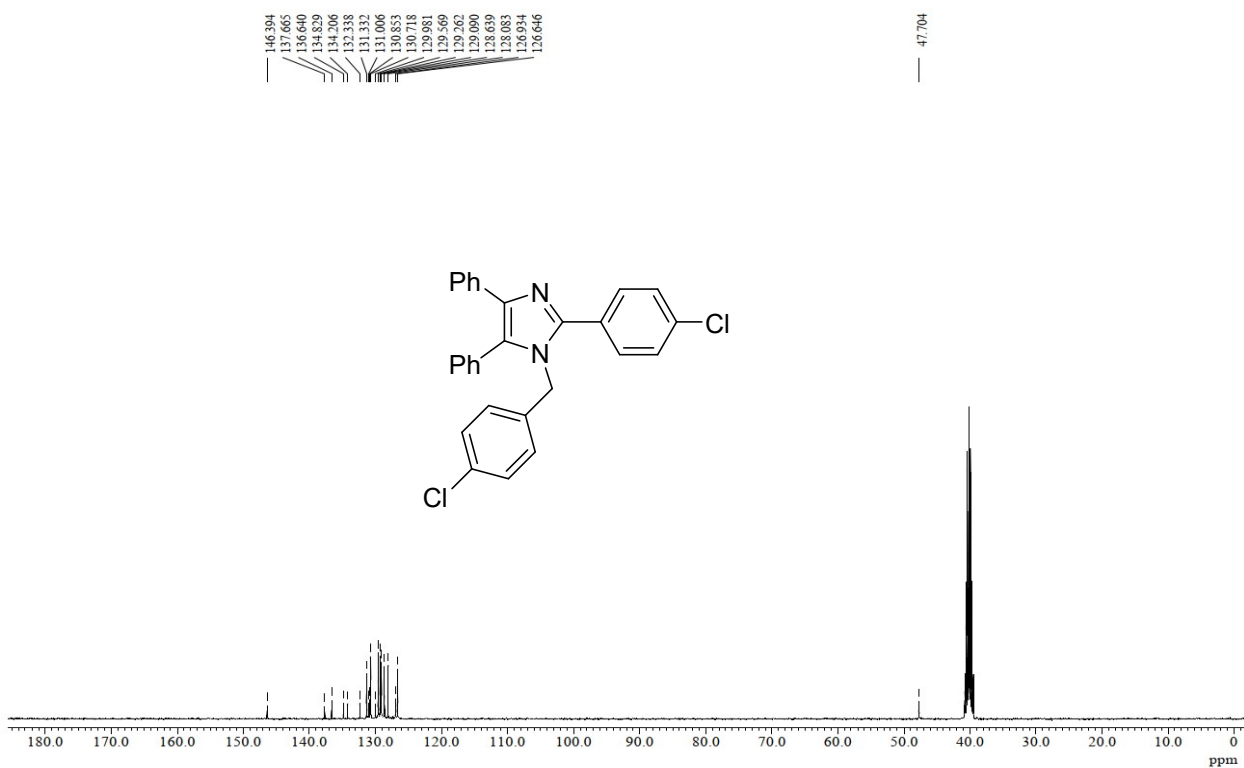



### 1.11 $^1\text{H}$ NMR of compound: **3f**

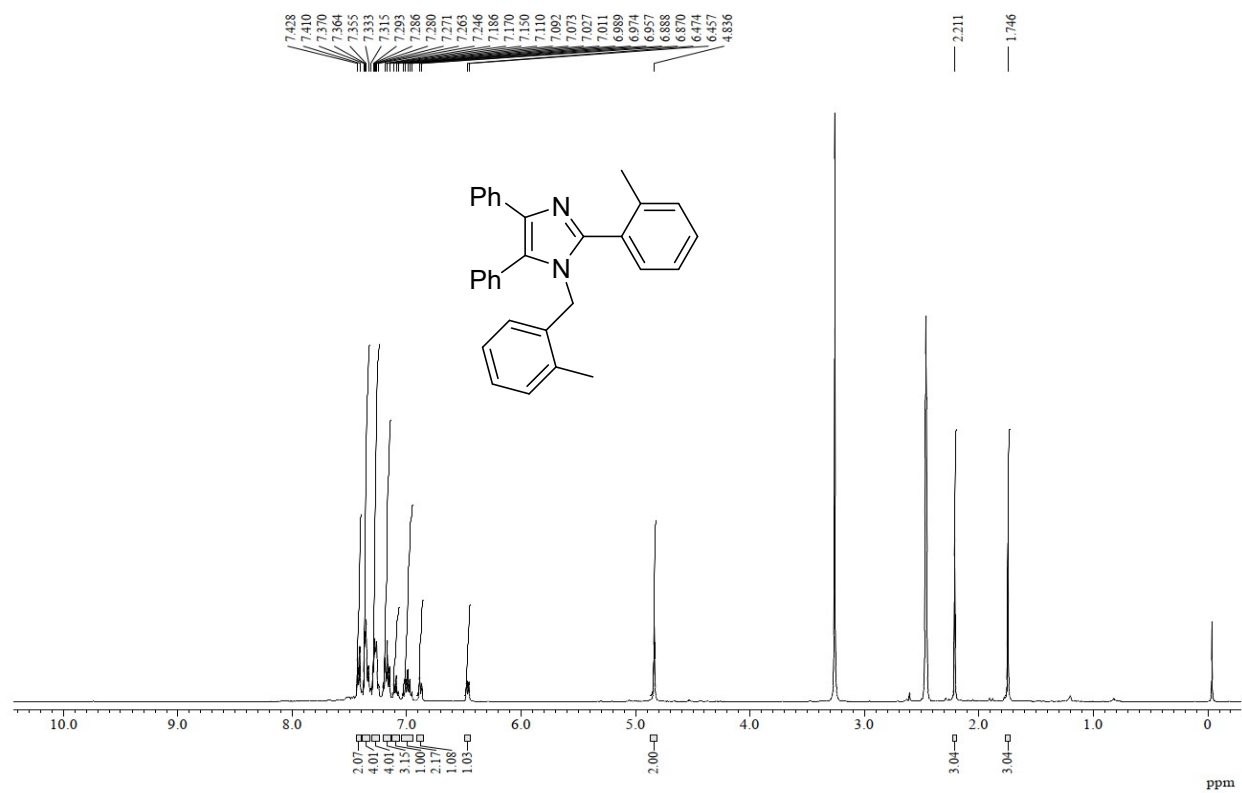

### 1.12 $^{13}\text{C}$ NMR of compound: **3f**

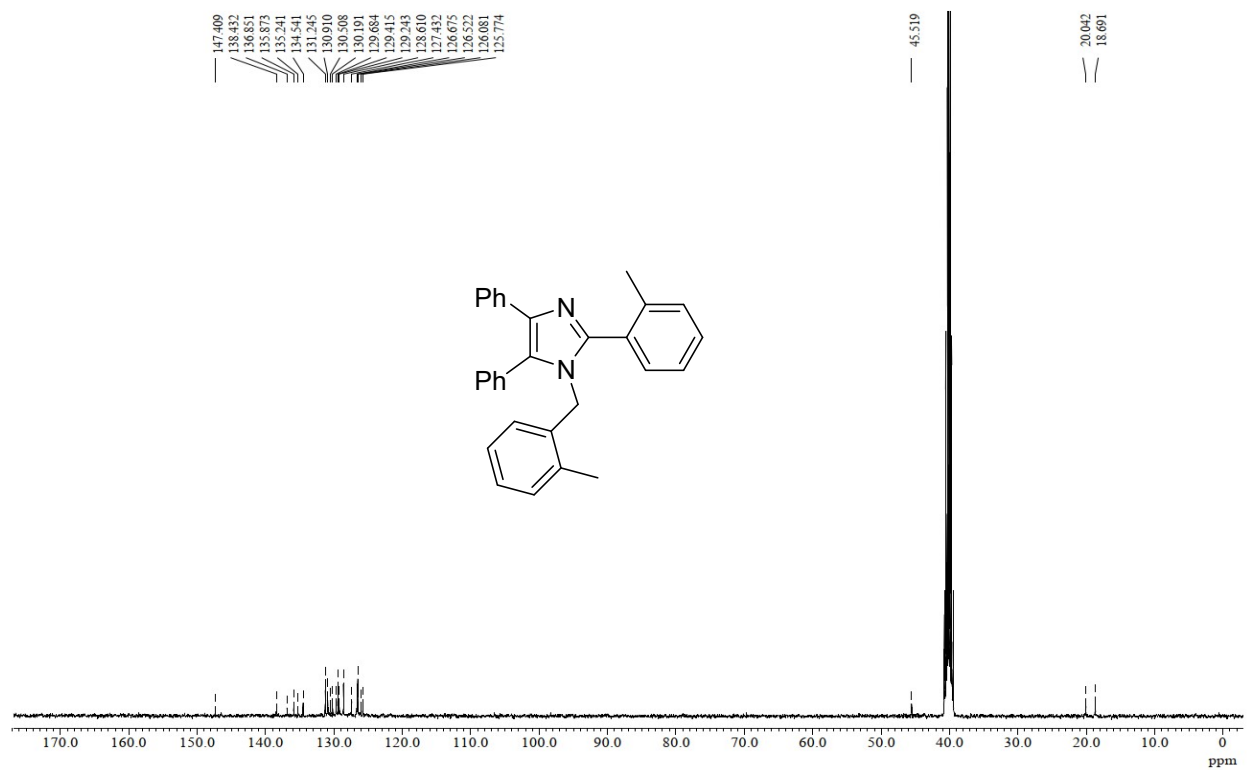

### 1.13 HRMS of compound: **3f**

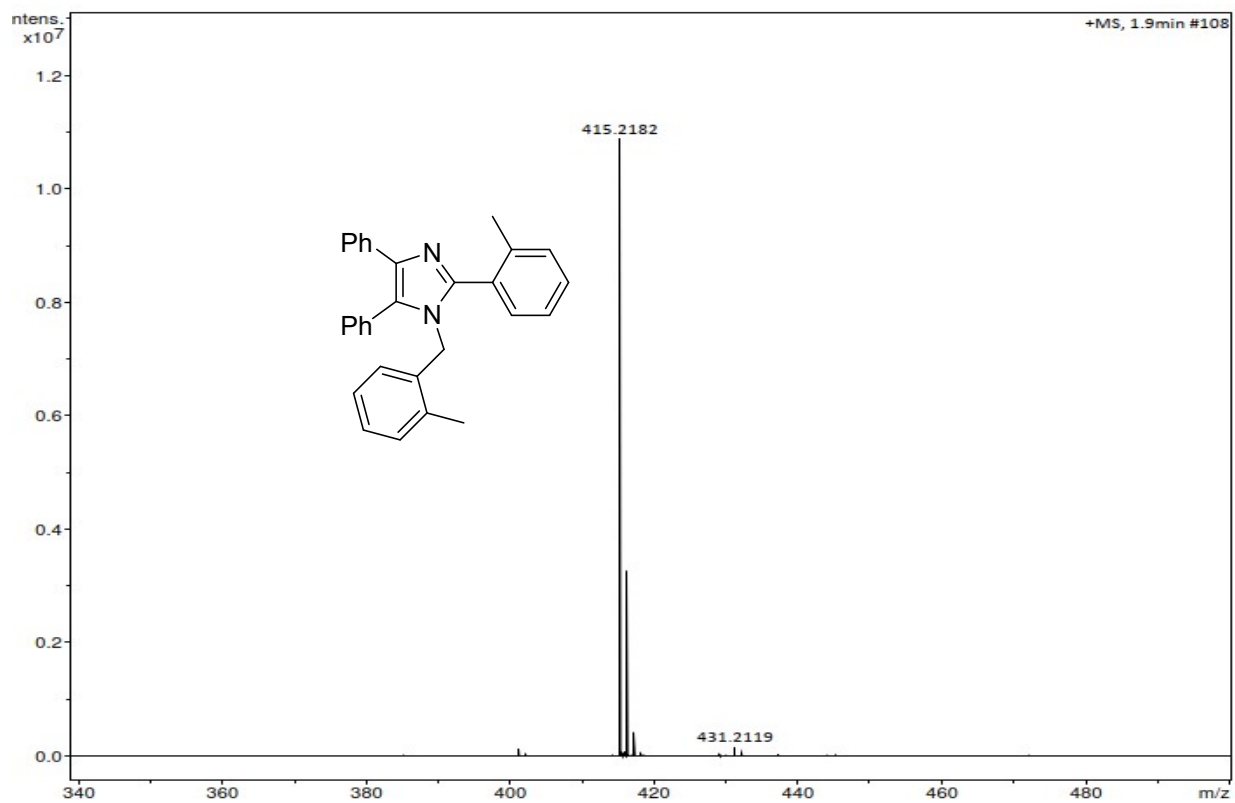

### 1.14 <sup>1</sup>H NMR of compound: **3g**

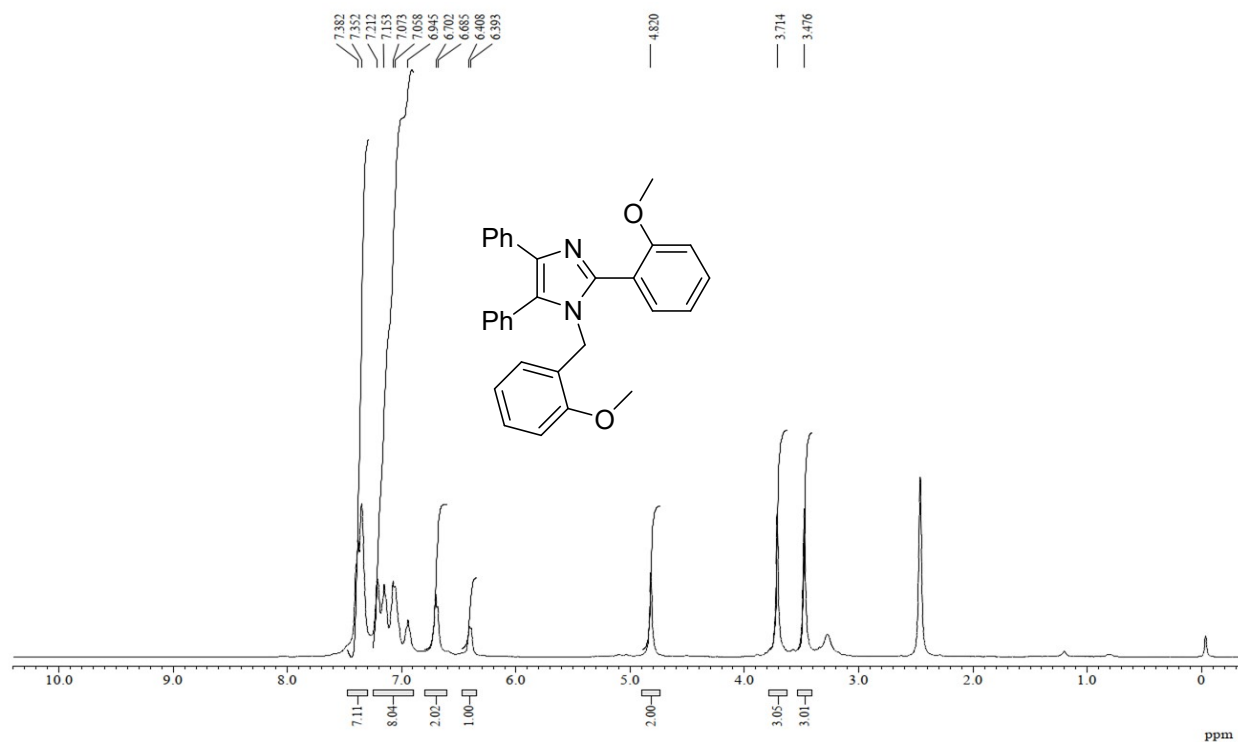

### 1.15 $^{13}\text{C}$ NMR of compound: **3g**

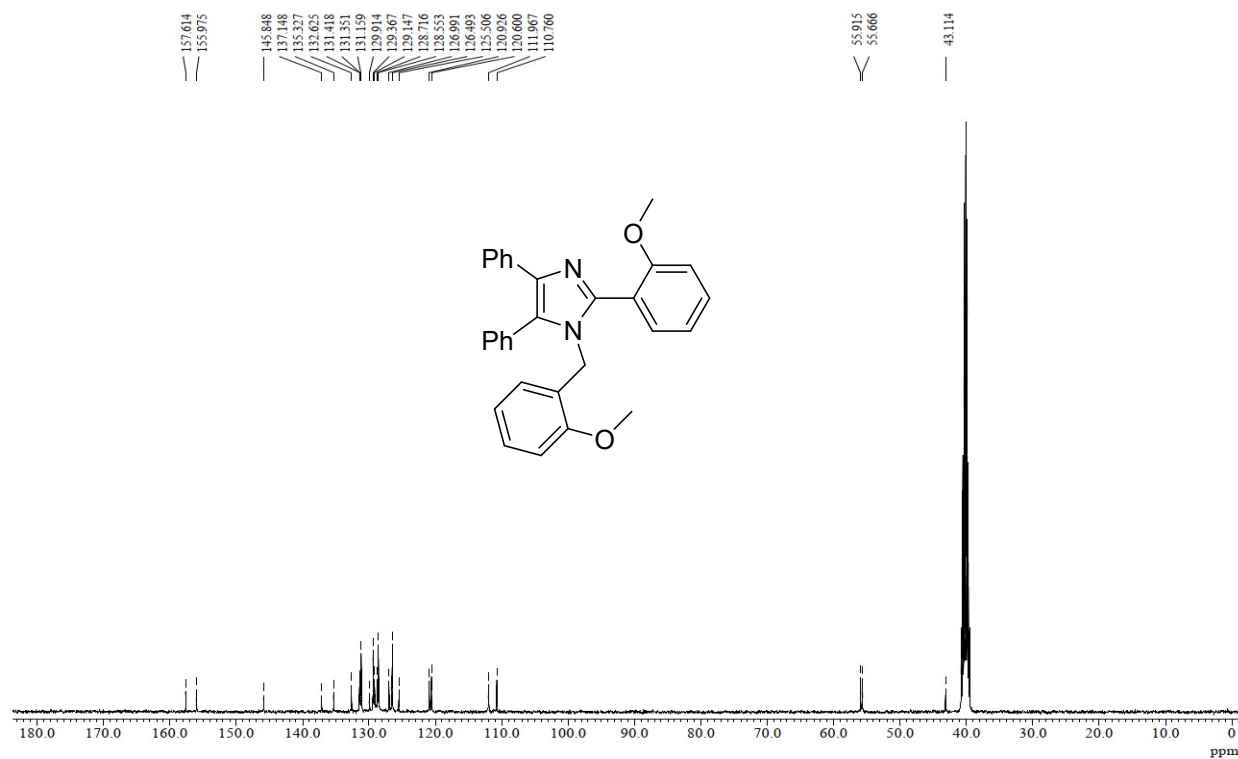

### 1.16 $^1\text{H}$ NMR of compound: **3h**

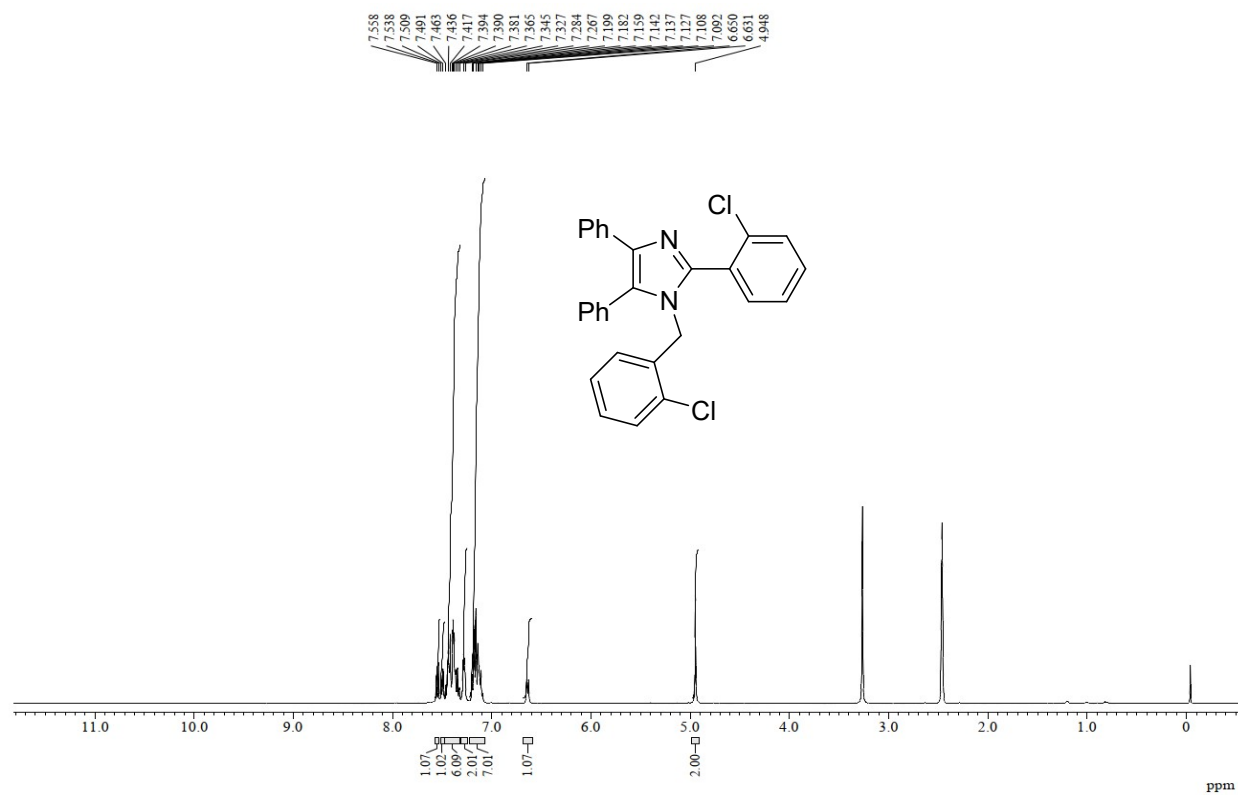

### 1.17 $^{13}\text{C}$ NMR of compound: **3h**

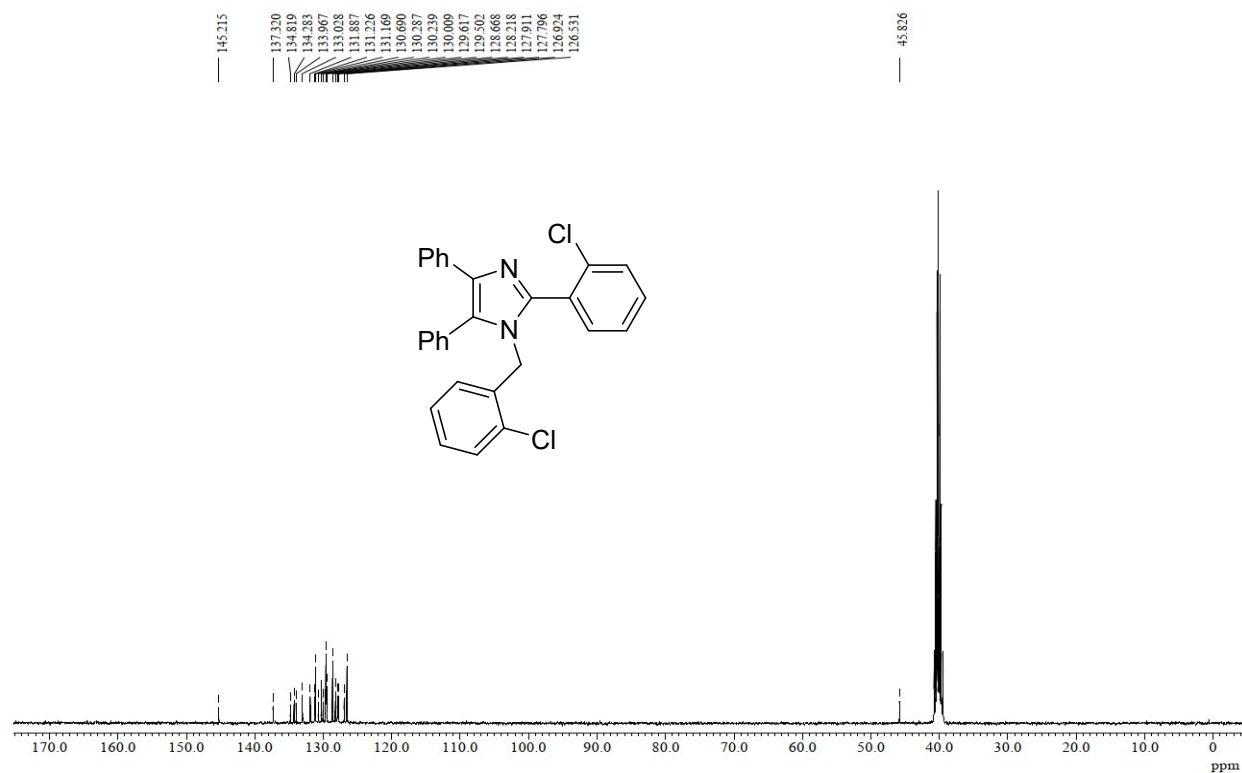

### 1.18 $^1\text{H}$ NMR of compound: **3i**

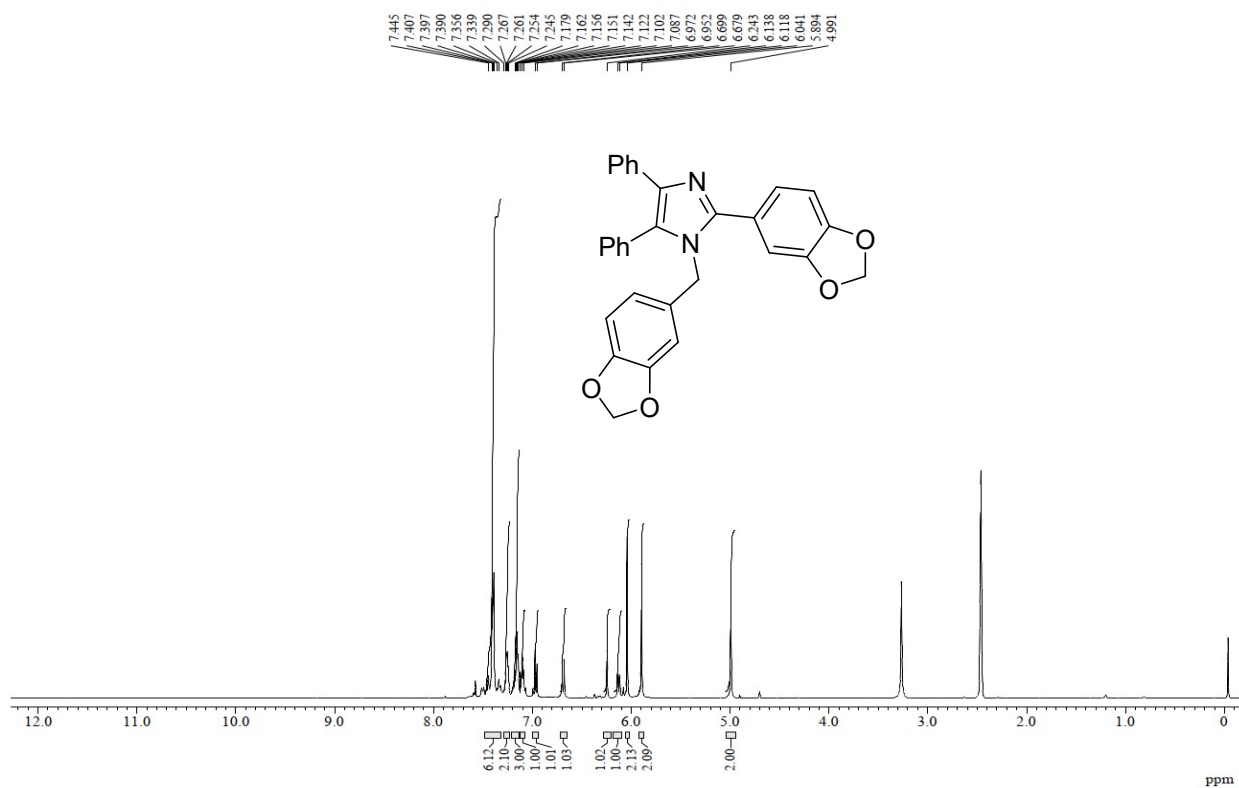

### 1.19 $^{13}\text{C}$ NMR of compound: **3i**

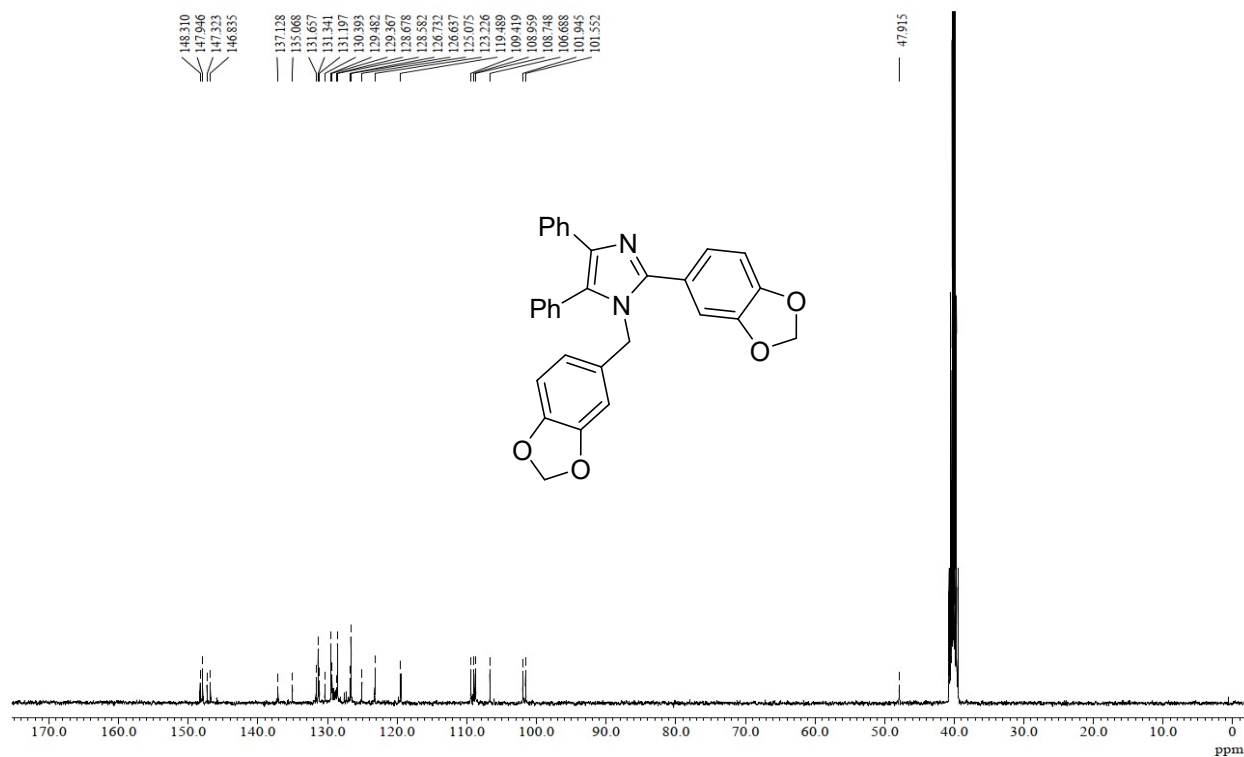

### 1.20 $^1\text{H}$ NMR of compound: **3j**

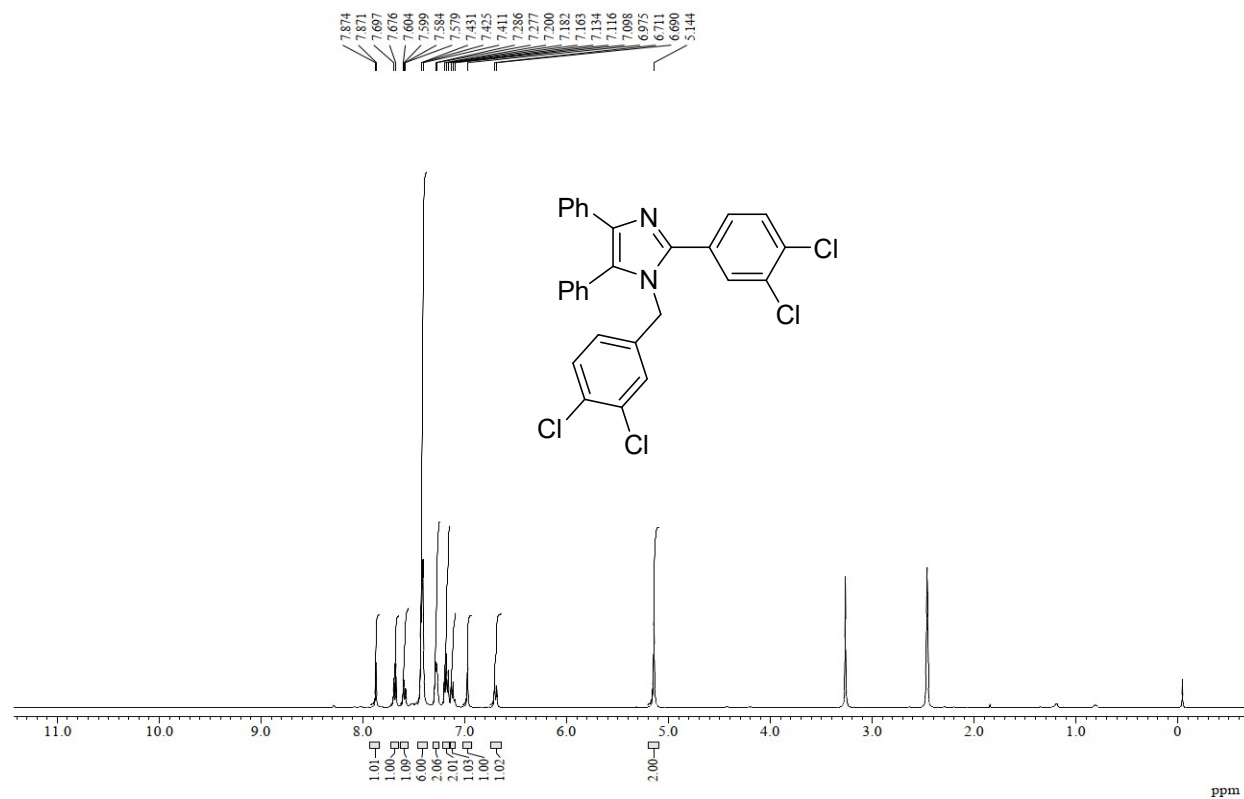

### 1.21 $^{13}\text{C}$ NMR of compound: **3j**

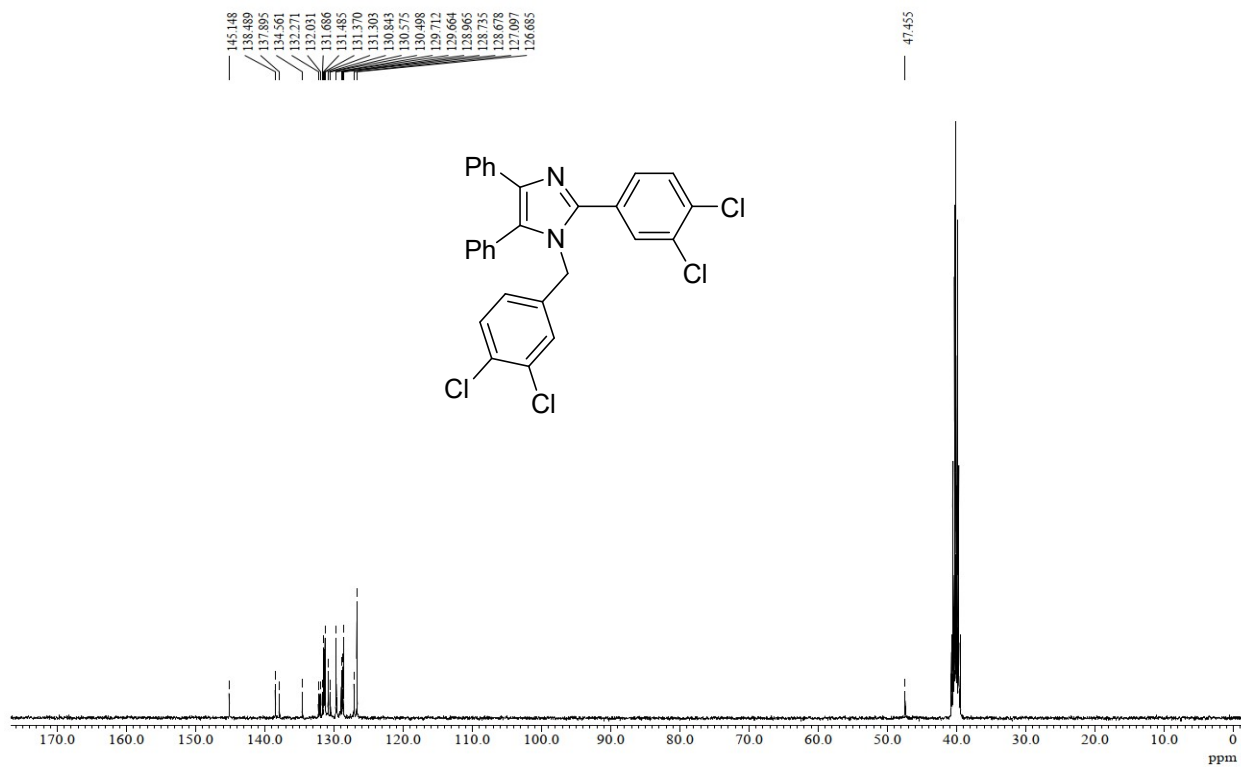

### 1.22 $^1\text{H}$ NMR of compound: **3k**

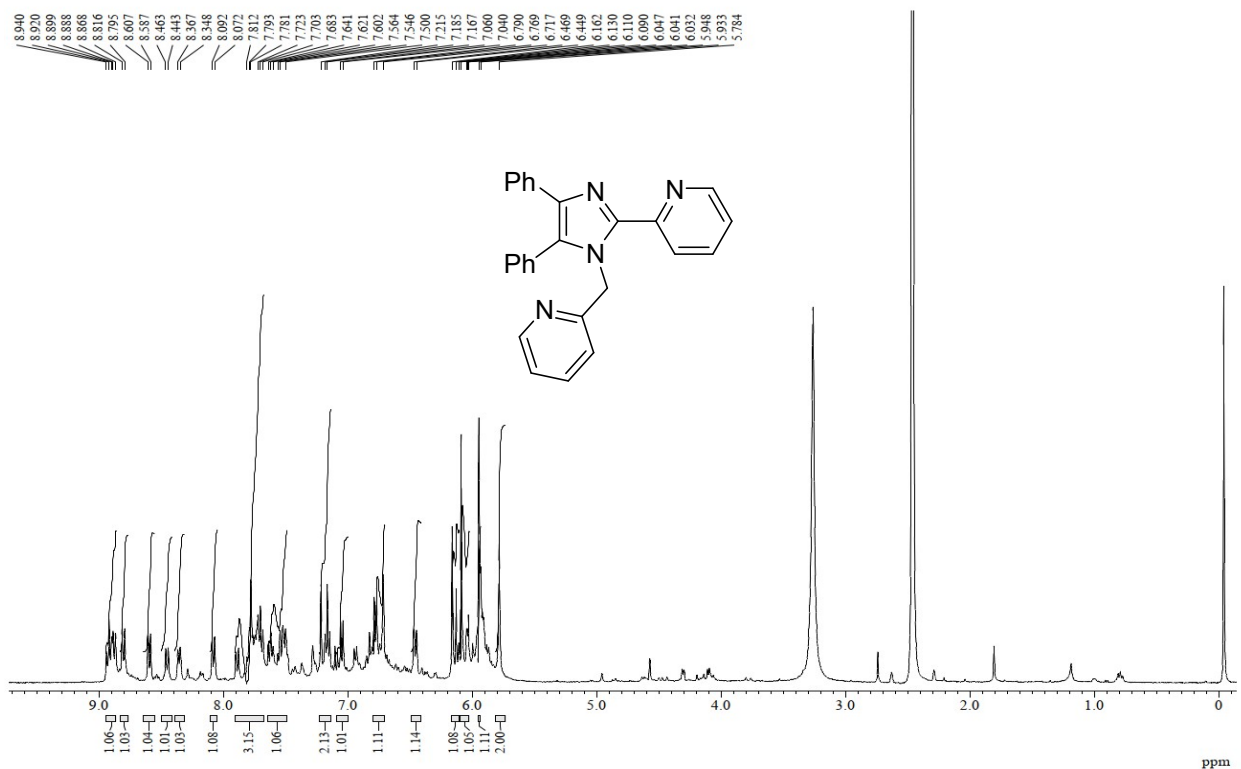

### 1.23 $^{13}\text{C}$ NMR of compound: **3k**

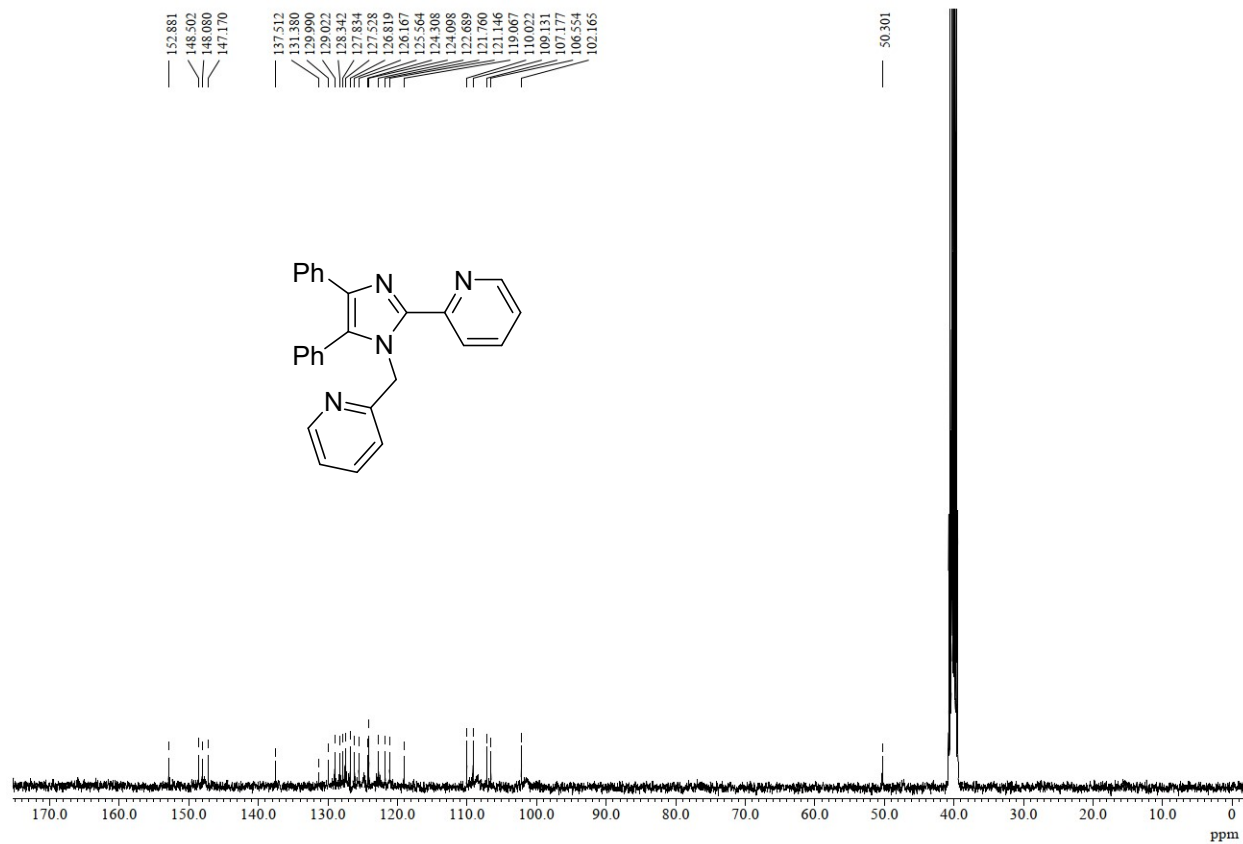

### 1.24 $^1\text{H}$ NMR of compound: **3l**

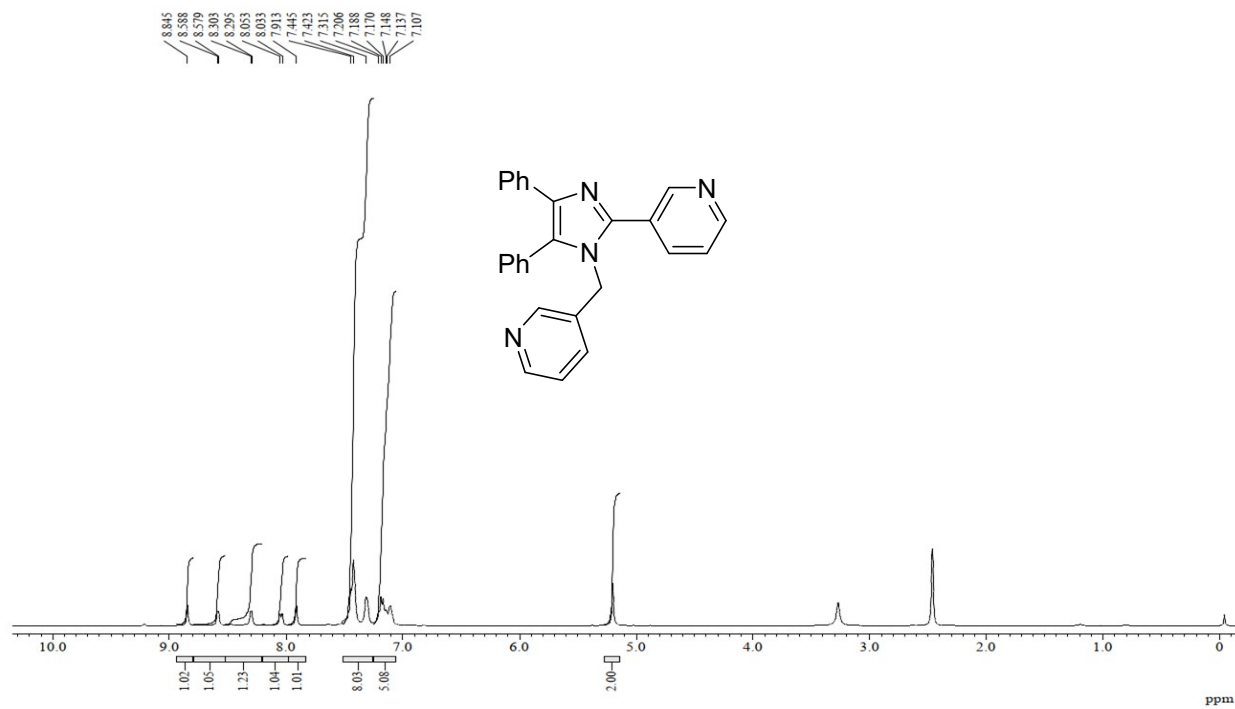

### 1.25 $^{13}\text{C}$ NMR of compound: **31**

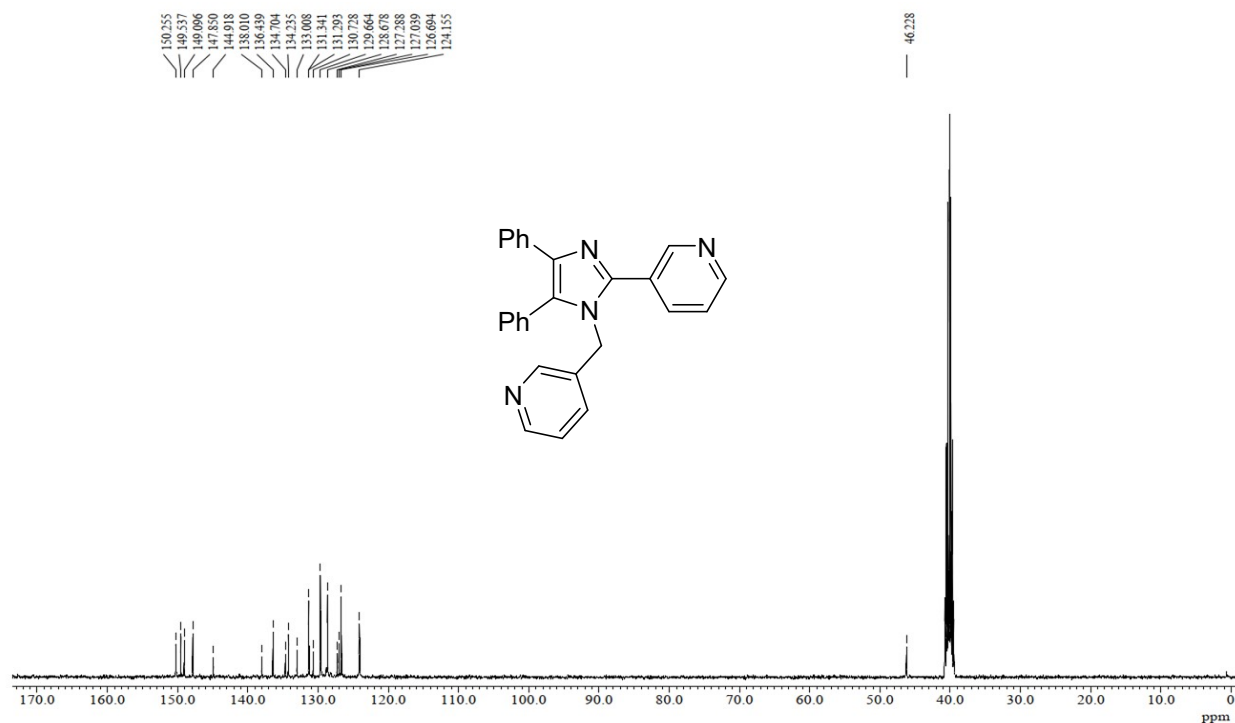

### 1.26 HRMS of compound: **31**

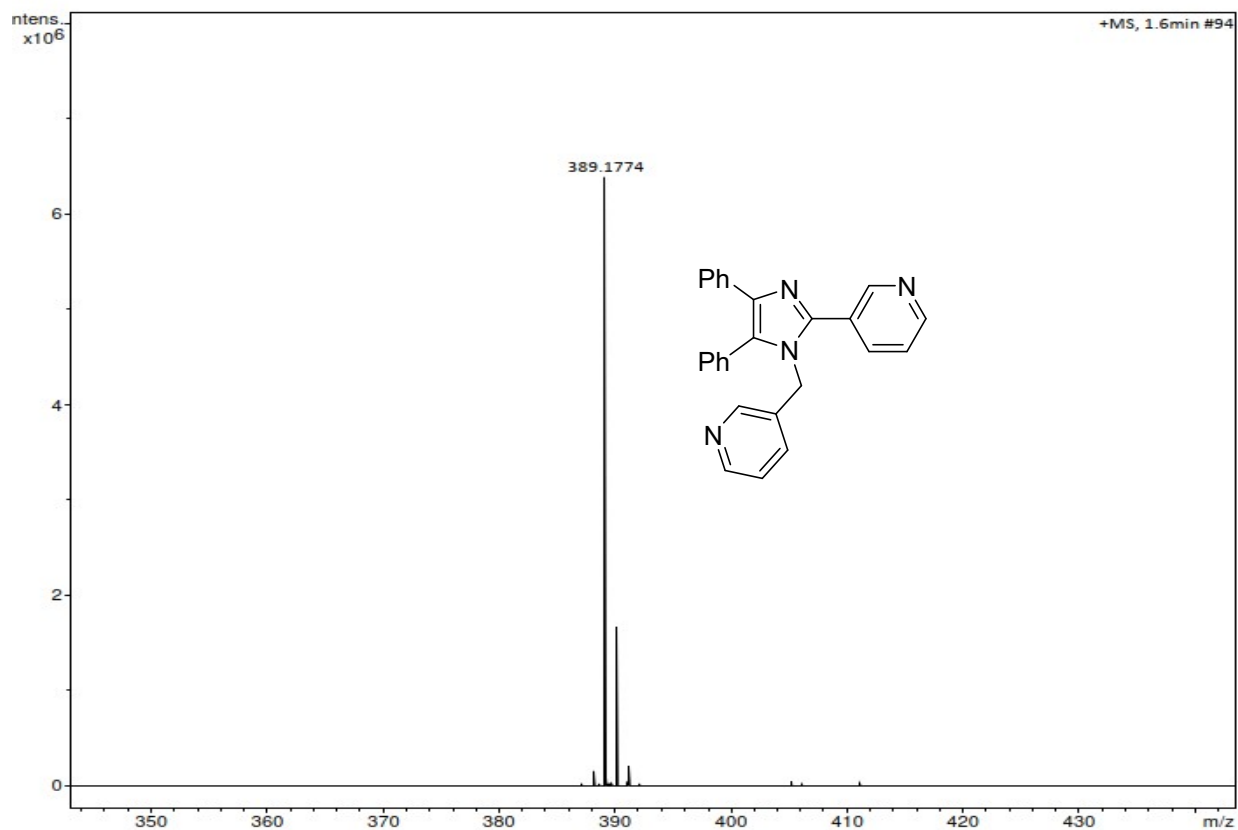



### 1.27 $^1\text{H}$ NMR of compound: **3m**

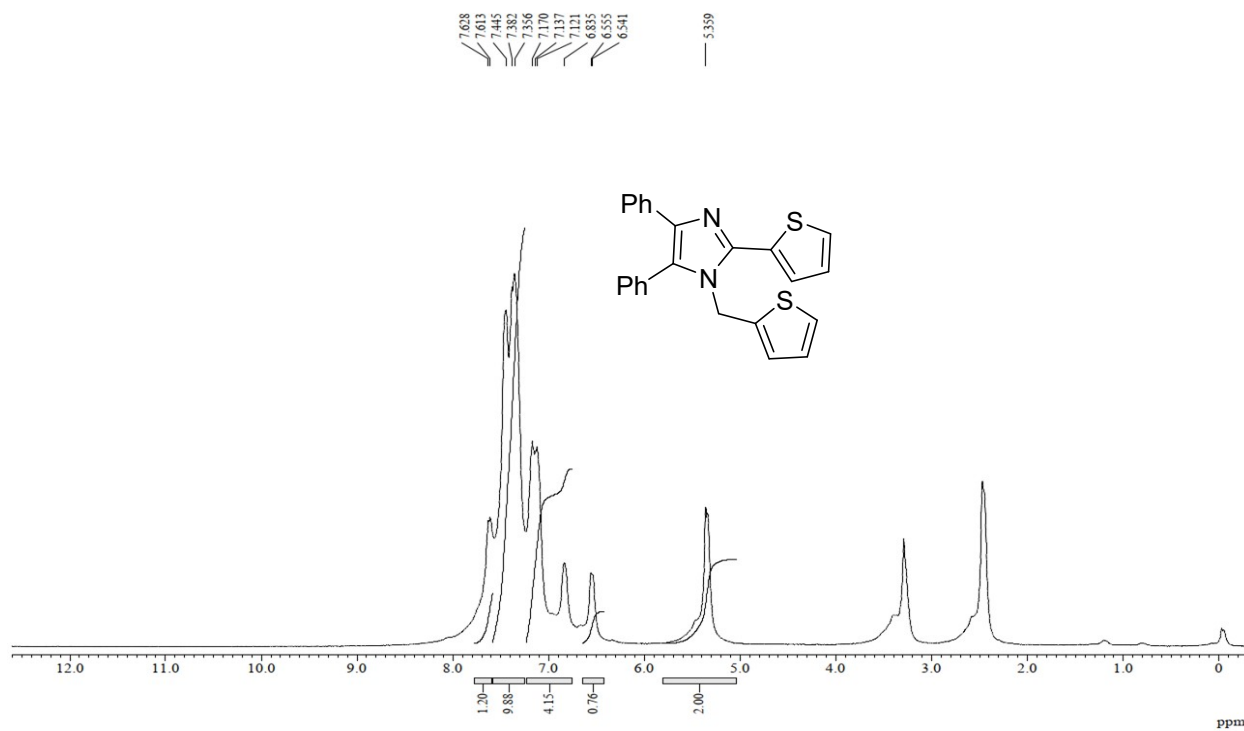

### 1.28 $^{13}\text{C}$ NMR of compound: **3m**

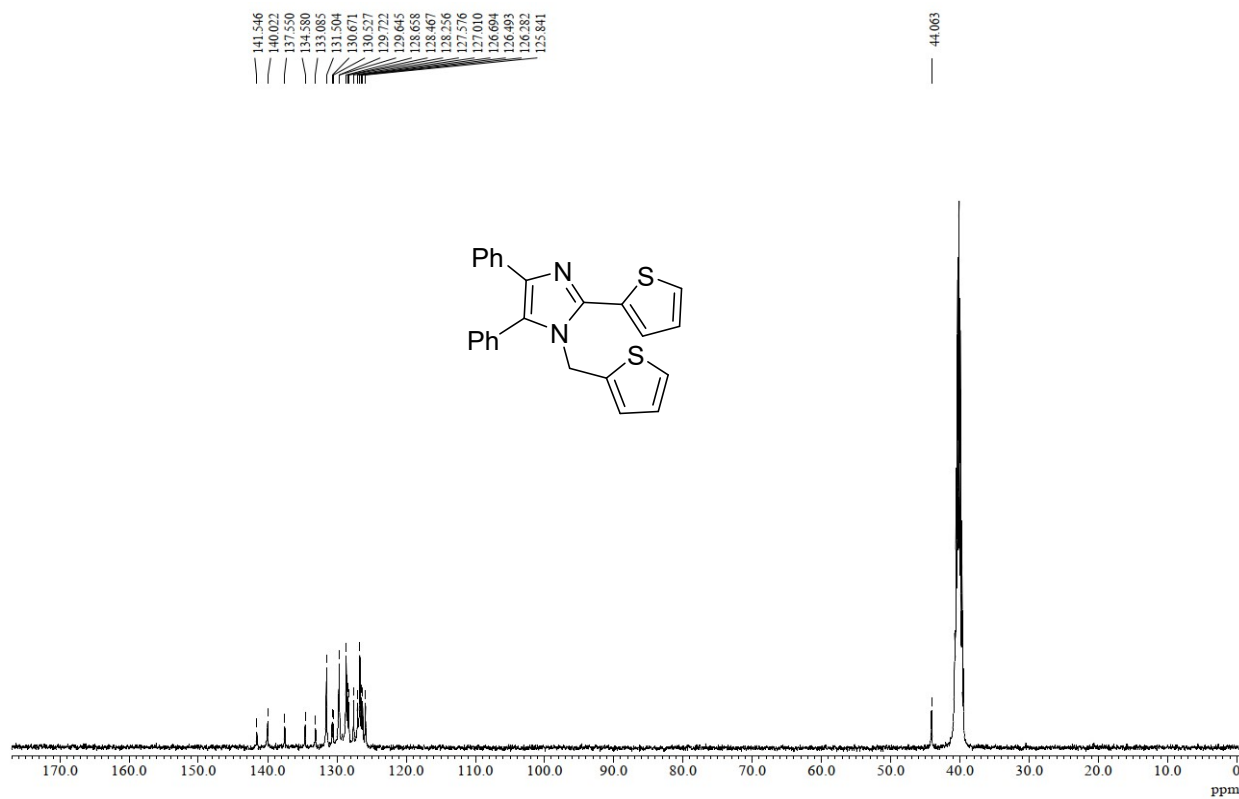

### 1.29 $^1\text{H}$ NMR of compound: **3n**

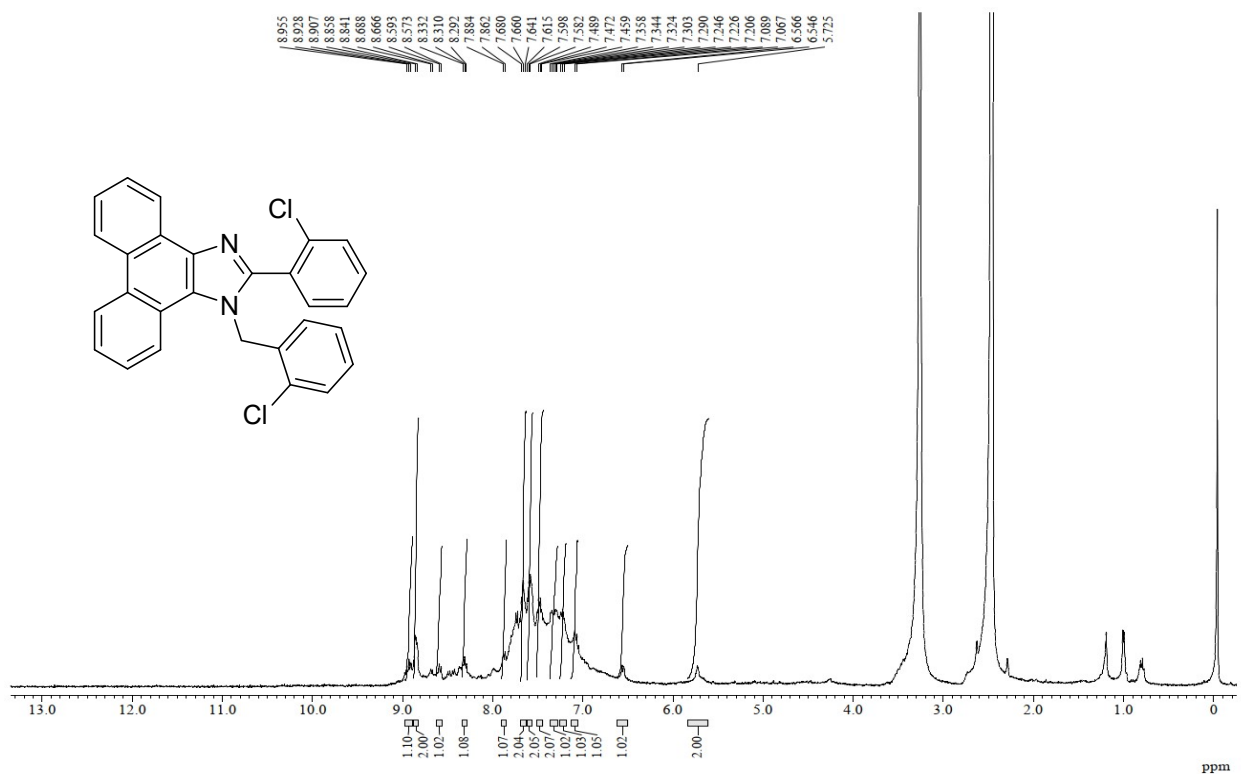

### 1.30 $^{13}\text{C}$ NMR of compound: **3n**

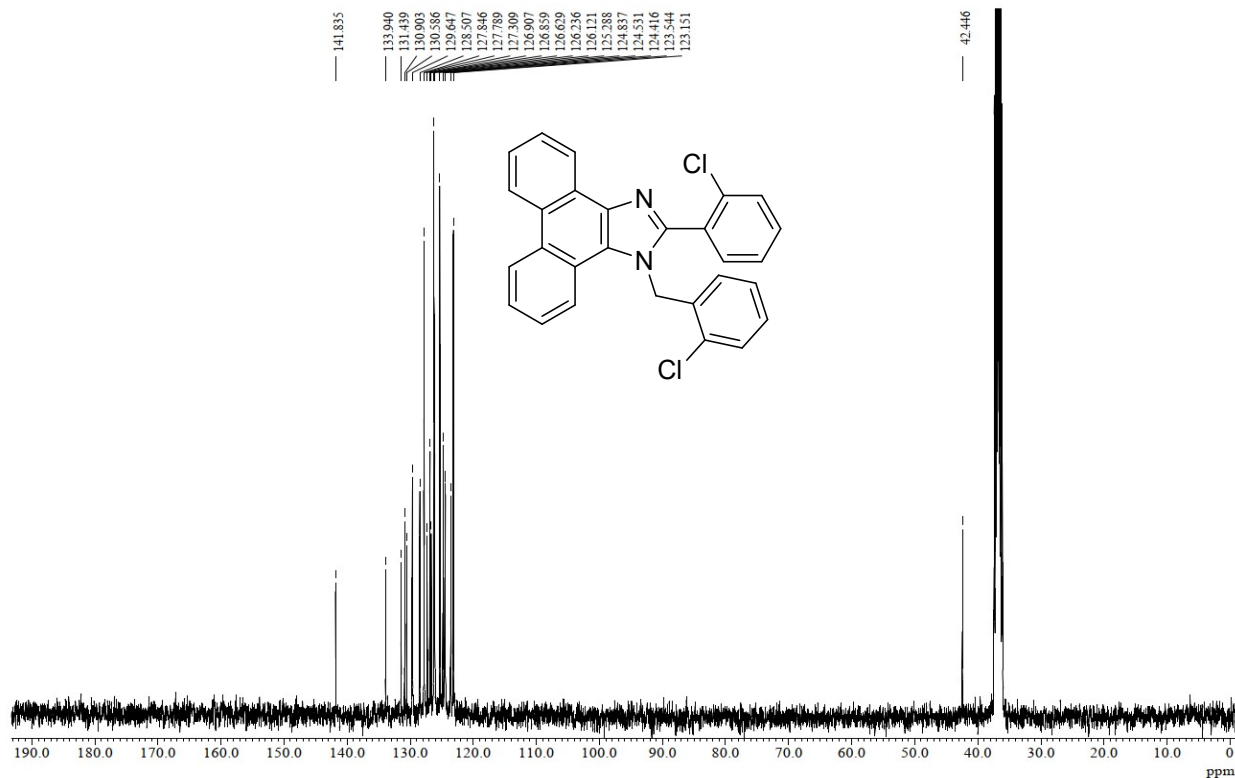

### 1.31 HRMS of compound: **3n**

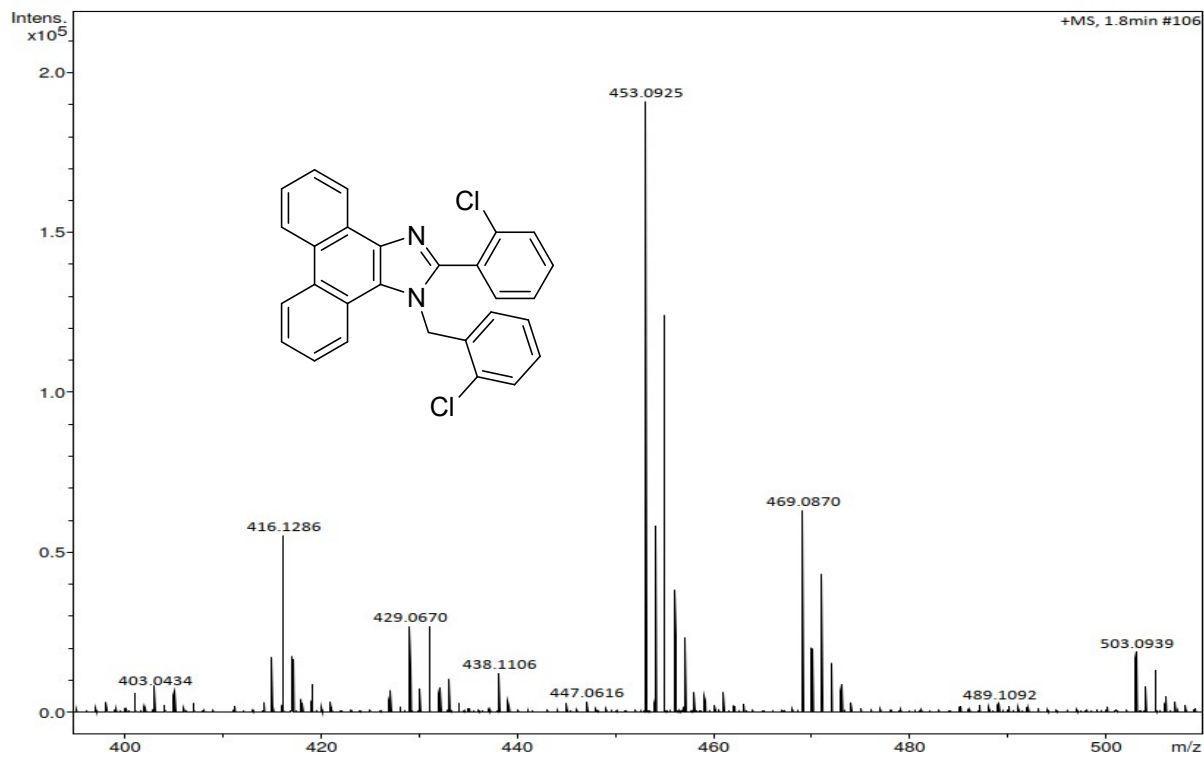

### 1.32 $^1\text{H}$ NMR of compound: **3o**

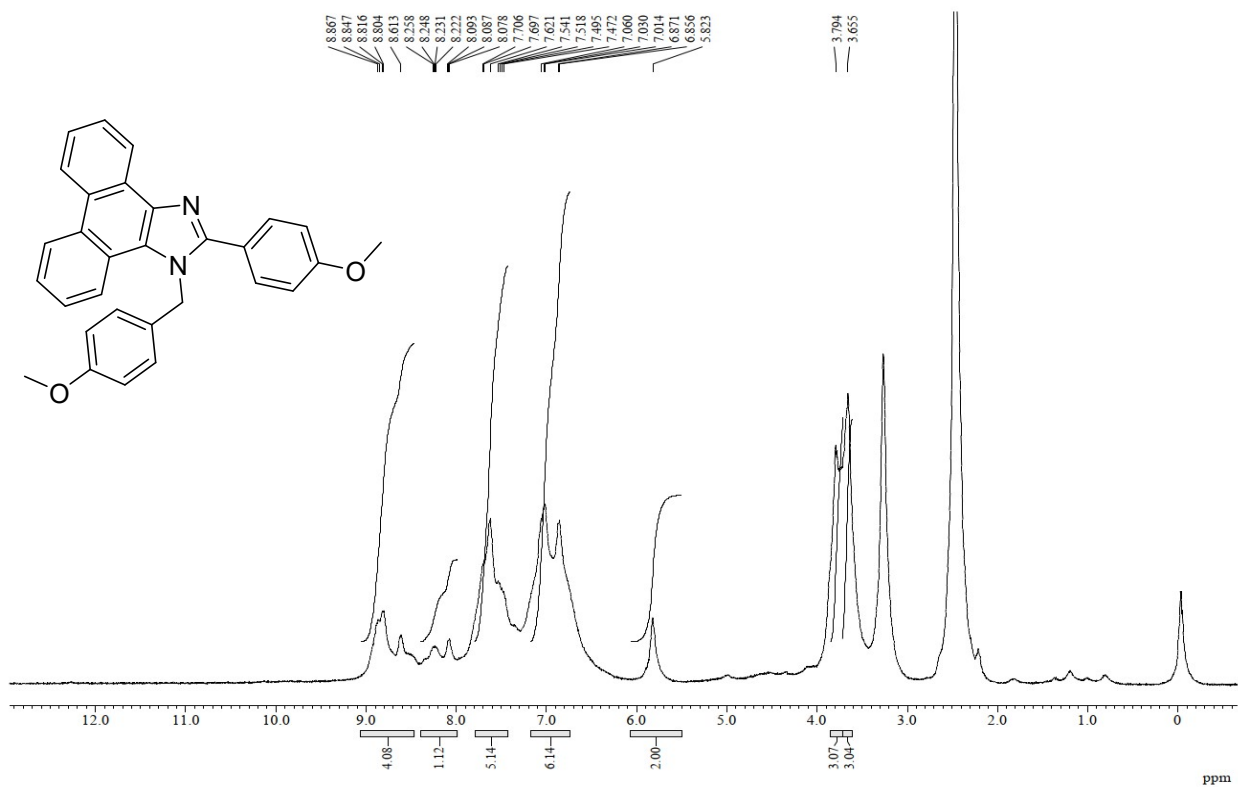

### 1.33 $^{13}\text{C}$ NMR of compound: **30**

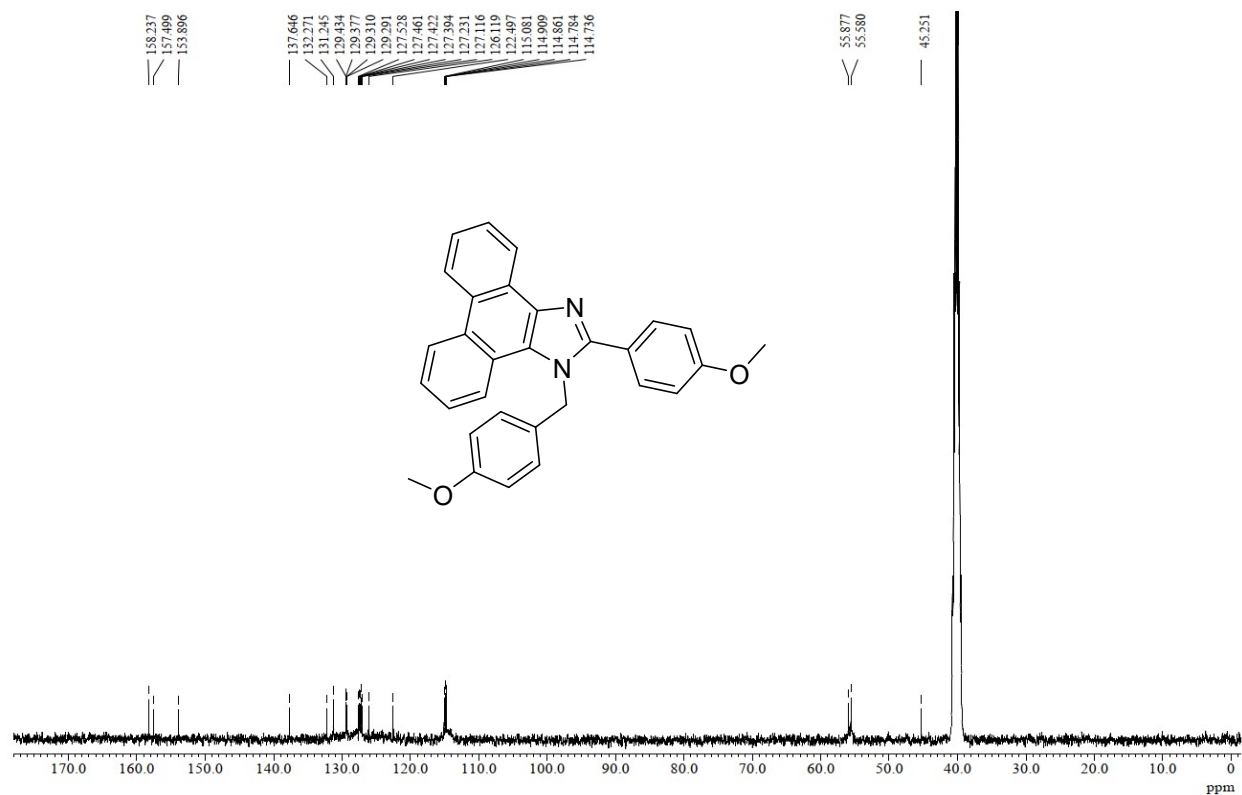

### 1.34 HRMS of compound: **30**

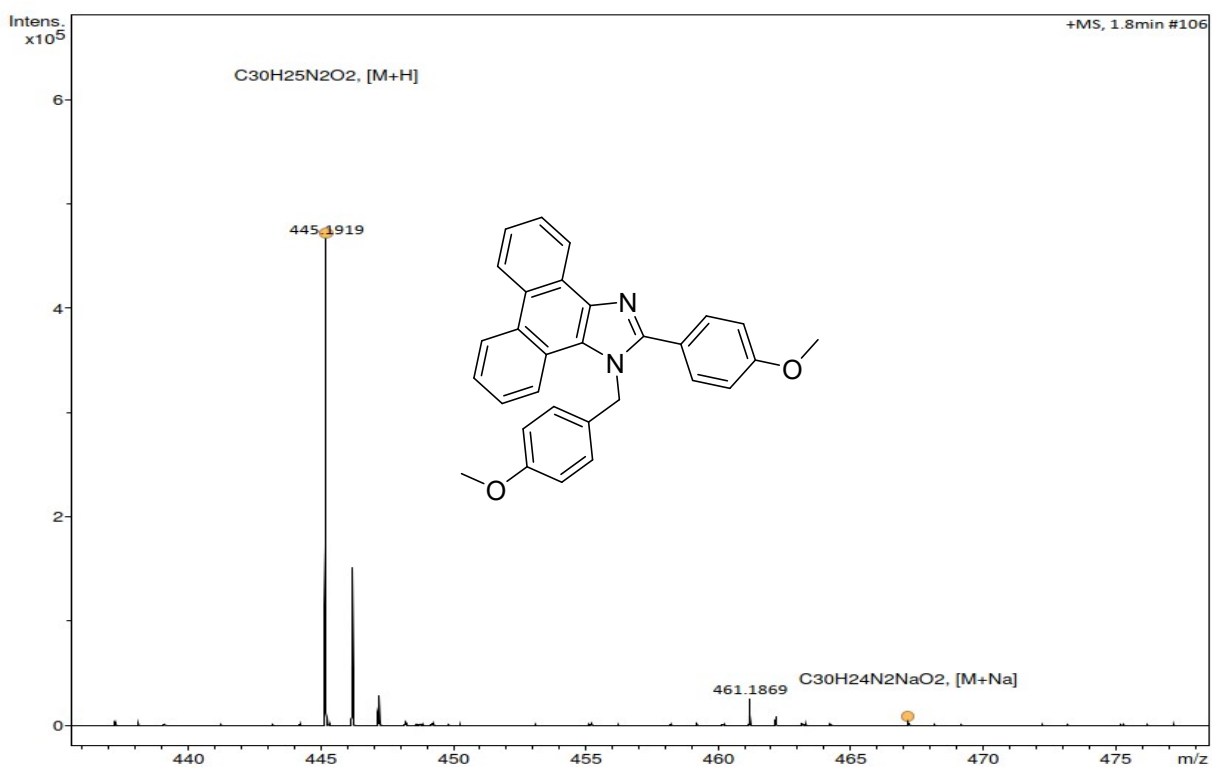

1.35  $^1\text{H}$  NMR of compound: **3p**

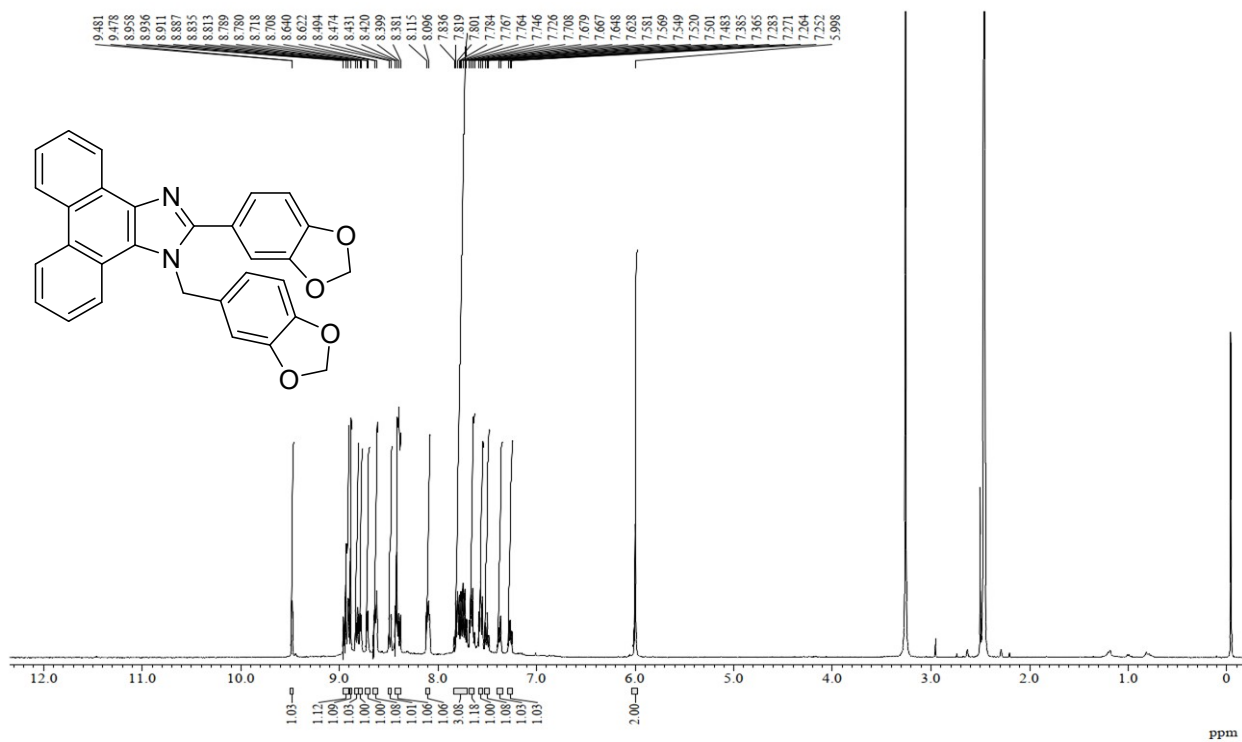

1.36  $^{13}\text{C}$  NMR of compound: **3p**

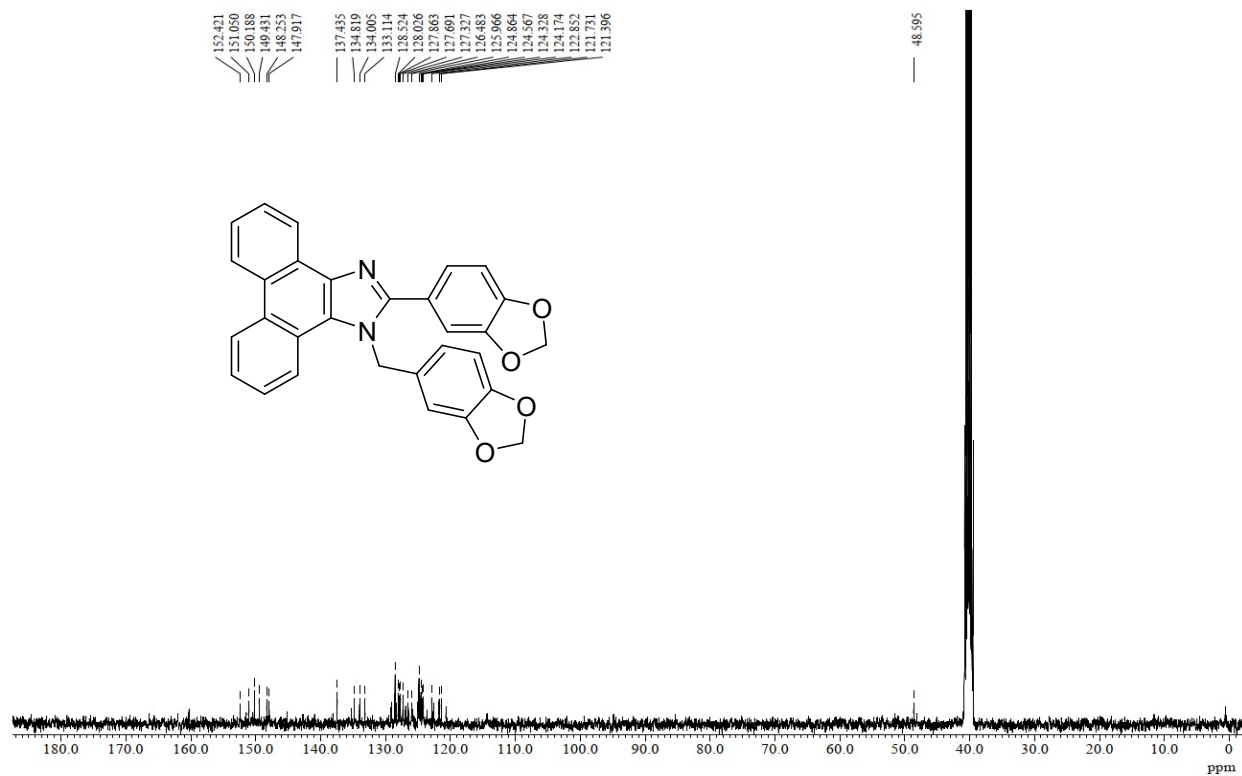

1.37 HRMS of compound: **3p**

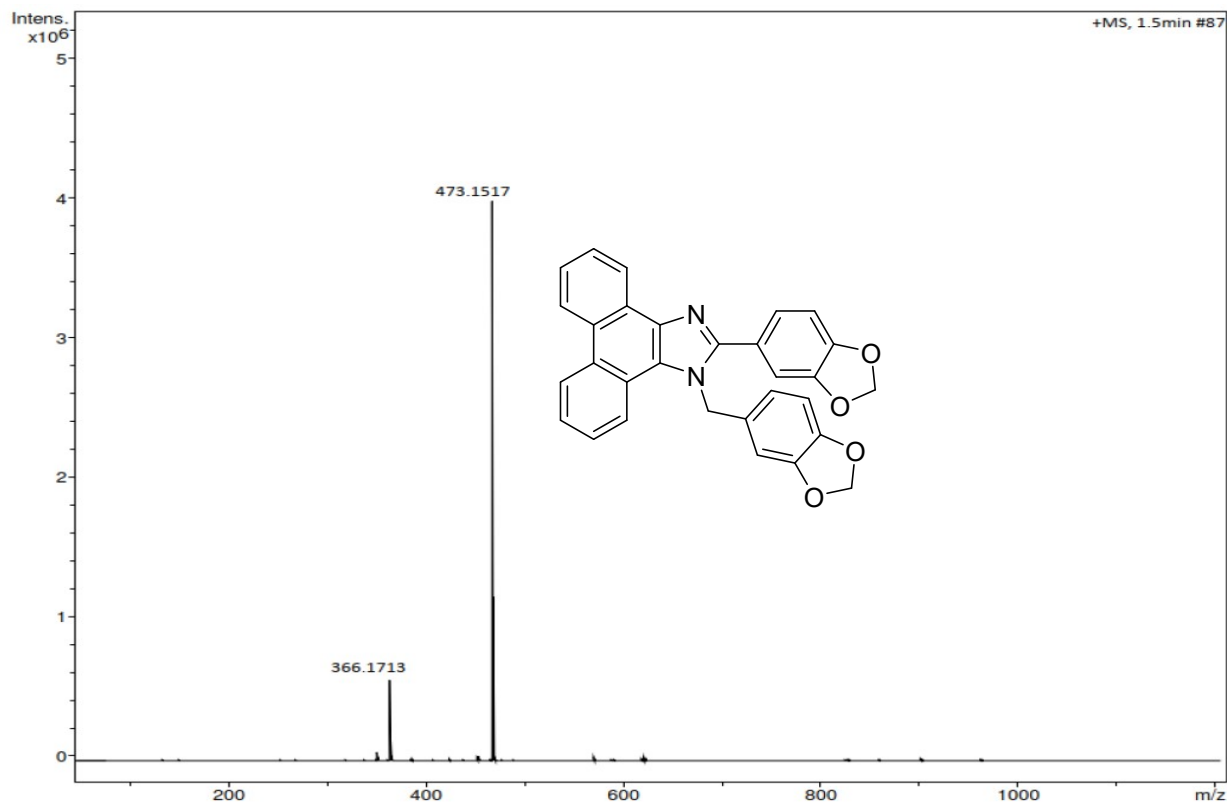

1.38 <sup>1</sup>H NMR of compound: **3q**

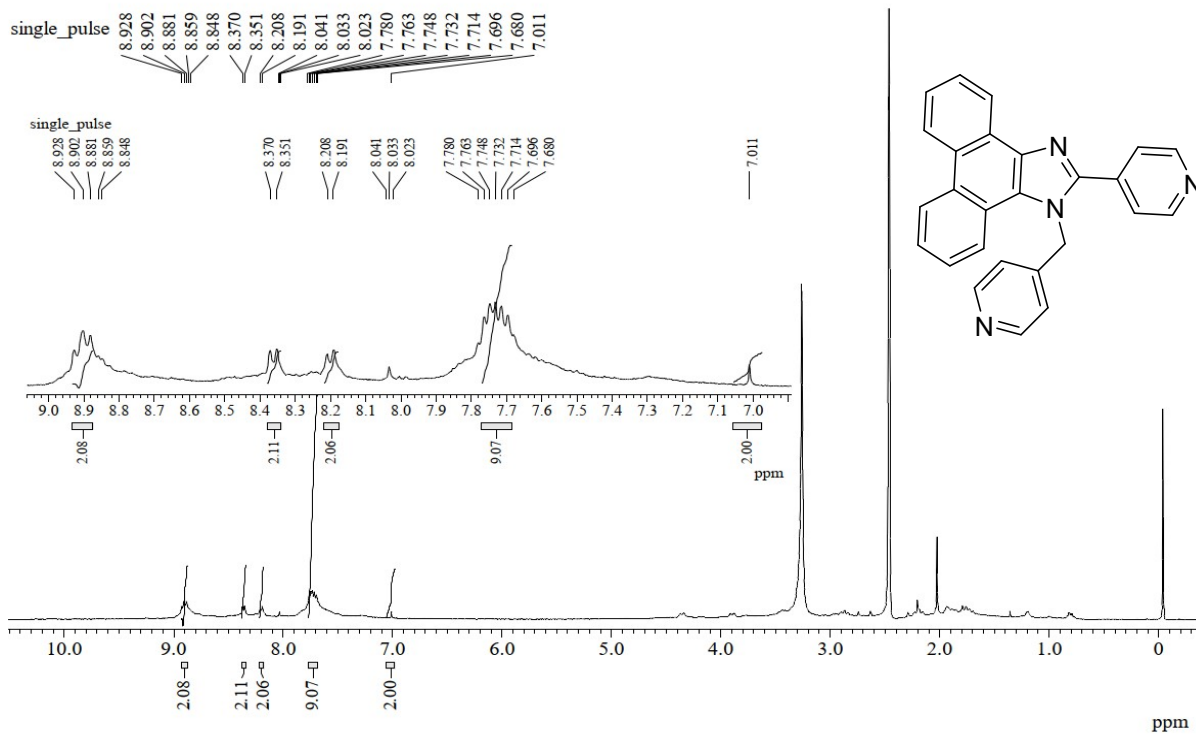

### 1.39 $^{13}\text{C}$ NMR of compound: **3q**

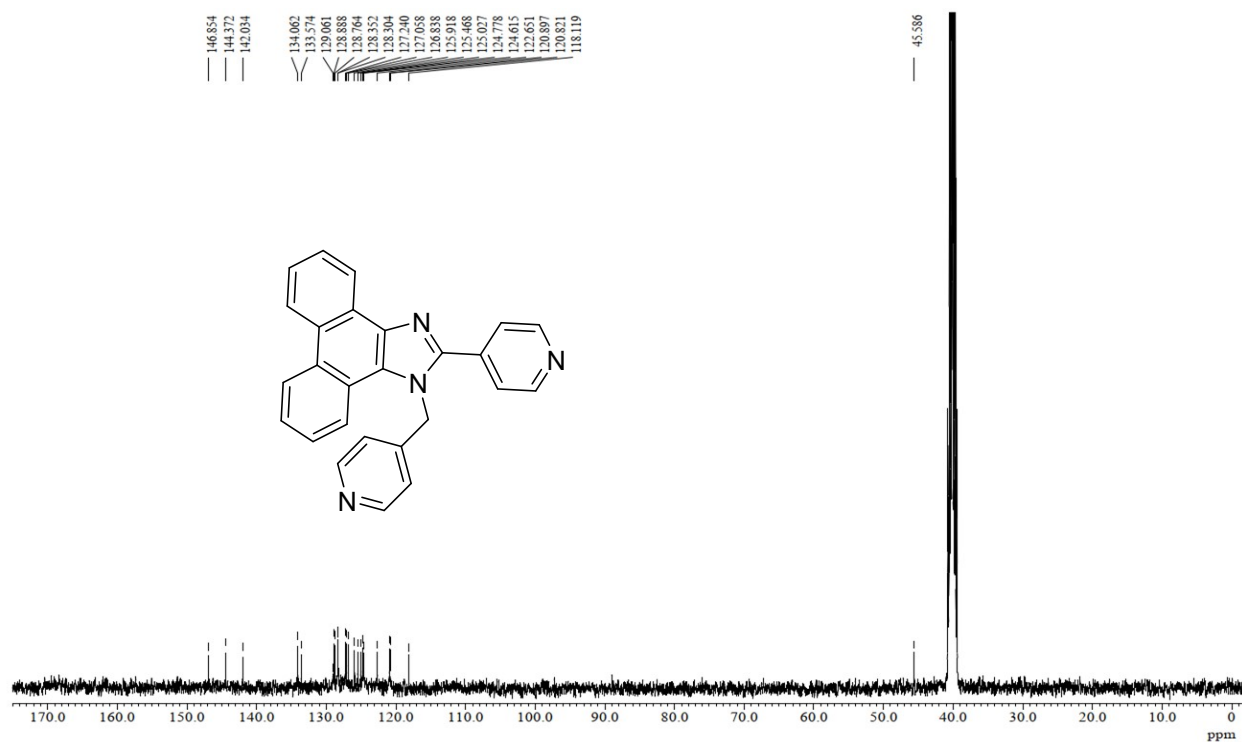

### 1.40 HRMS of compound: **3q**

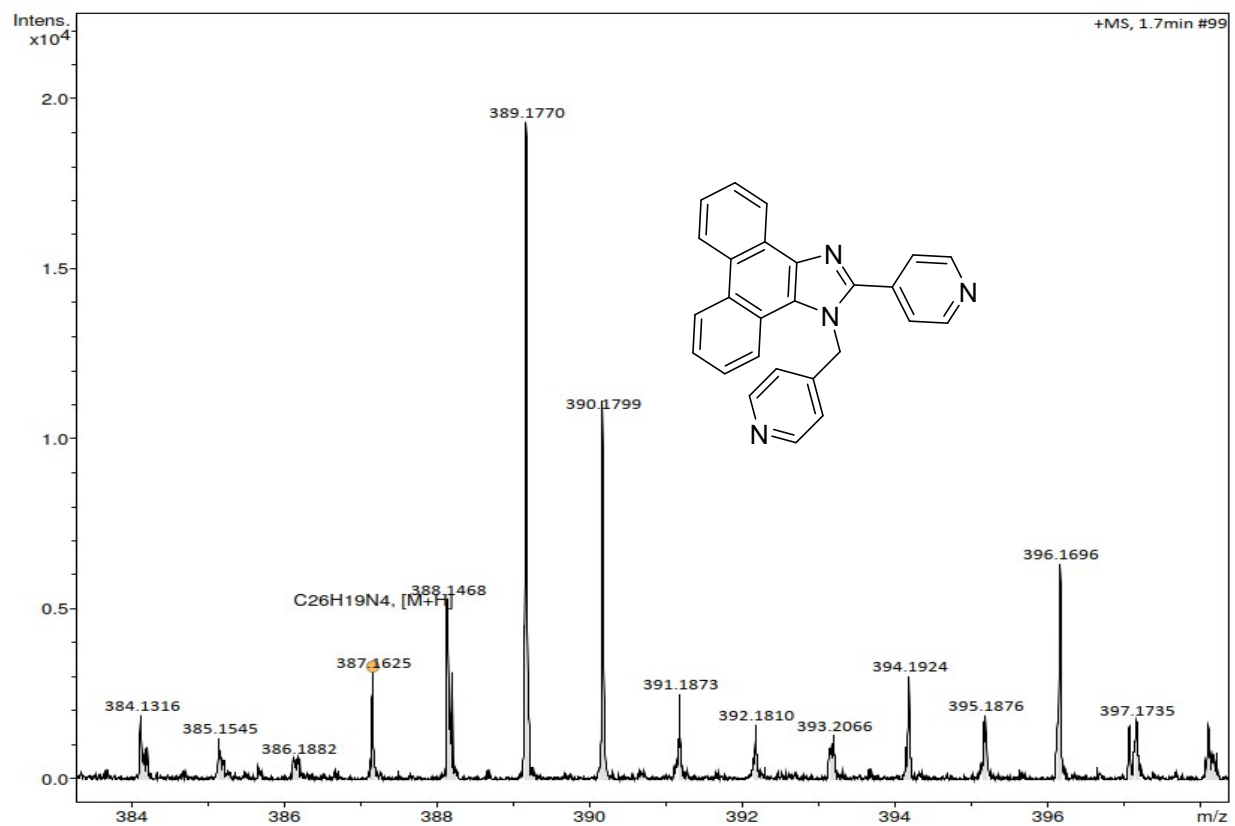

### 1.41 $^1\text{H}$ NMR of compound: **3r**

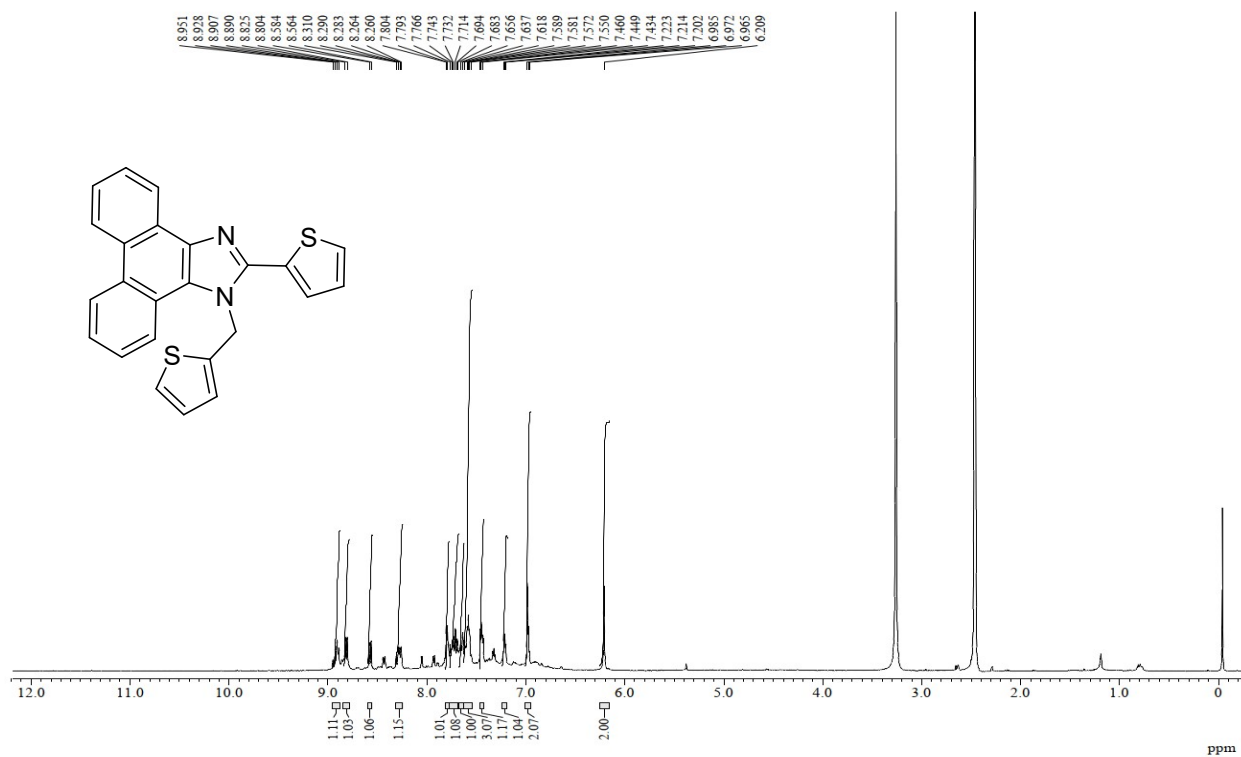

### 1.42 $^{13}\text{C}$ NMR of compound: **3r**

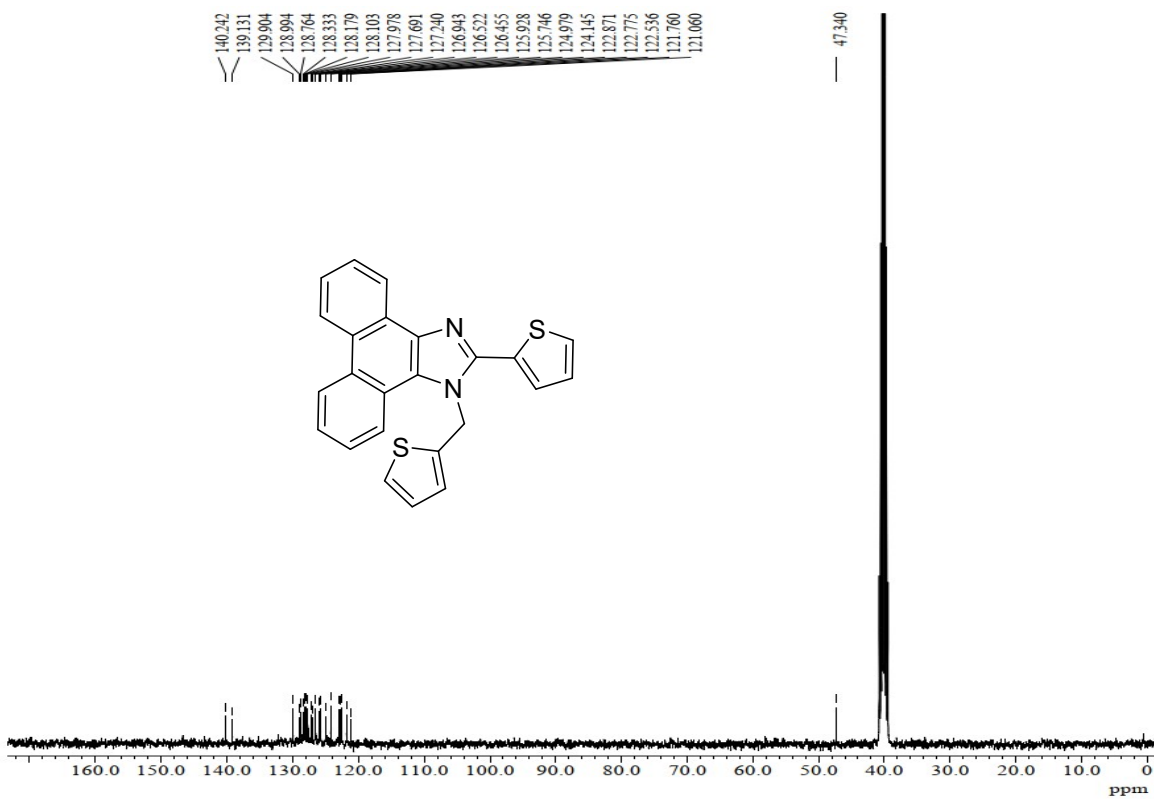



### 1.43 HRMS of compound: **3r**

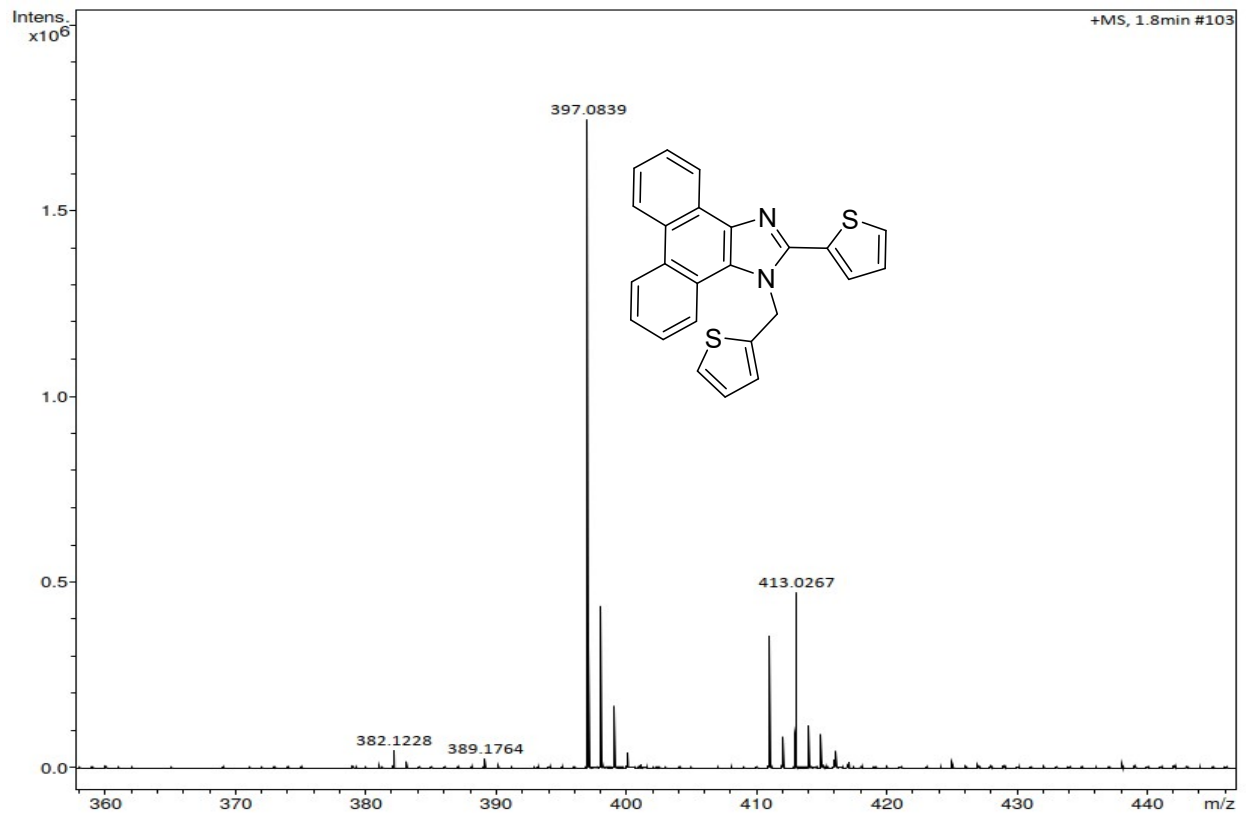

Supplement: d4ra03939d1.pdf [file d4ra03939d1.pdf]
